# Supplementary material for: Construction and validation of a fatty acid metabolism-related gene signature for predicting prognosis and therapeutic response in patients with prostate cancer
Source: PeerJ. 2023 Feb 6;11:e14854. doi: 10.7717/peerj.14854 (PMC9910187; doi:10.7717/peerj.14854)
Supplement: Supplemental Information 1 — Table S1. The list of fatty acid-related genes. Table S2. Clinical characteristics of patients with prostate cancer in the TCGA cohort. Table S3. Clinical characteristics of patients with prostate cancer in the GEO cohort. Table S4. The table of differentially expressed fatty acid-related genes between tumor and normal cases in the TCGA cohort. Table S5. The table of differentially expressed genes between high- and low-risk subgroups in the TCGA cohort. Table S6. GO enrichment of significant differentially expressed genes between the high- and low-risk subgroups in the TCGA cohort. Table S7. KEGG enrichment of significant differentially expressed genes between the high- and low-risk subgroups in the TCGA cohort. [file peerj-11-14854-s001.xlsx]

## Sheet: Table S1
Table S1. The list of fatty acid-related genes.
Gene name
ACAA1
ACAA2
ACADL
ACADM
ACADS
ACADSB
ACADVL
ACAT1
ACAT2
ACOX1
ACOX3
ACSL1
ACSL3
ACSL4
ACSL5
ACSL6
ADH1A
ADH1B
ADH1C
ADH4
ADH5
ADH6
ADH7
ALDH1B1
ALDH2
ALDH3A2
ALDH7A1
ALDH9A1
CPT1A
CPT1B
CPT1C
CPT2
CYP4A11
CYP4A22
ECHS1
ECI1
ECI2
EHHADH
GCDH
HADH
HADHA
HADHB
ABCC1
ABCD1
ACACA
ACACB
ACAD10
ACAD11
ACBD4
ACBD5
ACBD6
ACBD7
ACLY
ACOT1
ACOT11
ACOT12
ACOT13
ACOT2
ACOT4
ACOT6
ACOT7
ACOT8
ACOT9
ACOX2
ACOXL
ACSBG1
ACSBG2
ACSF2
ACSF3
ACSM3
ACSM6
AKR1C3
ALOX12
ALOX12B
ALOX15
ALOX15B
ALOX5
ALOX5AP
ALOXE3
AMACR
AWAT1
CBR1
CBR4
CRAT
CROT
CYP1A1
CYP1A2
CYP1B1
CYP2C19
CYP2C8
CYP2C9
CYP2J2
CYP2U1
CYP4B1
CYP4F11
CYP4F2
CYP4F22
CYP4F3
CYP4F8
CYP8B1
DBI
DECR1
DECR2
DPEP1
DPEP2
DPEP3
ELOVL1
ELOVL2
ELOVL3
ELOVL4
ELOVL5
ELOVL6
ELOVL7
EPHX2
FAAH
FAAH2
FADS1
FADS2
FASN
GGT1
GGT5
GPX1
GPX2
GPX4
HACD1
HACD2
HACD3
HACD4
HACL1
HAO2
HPGD
HPGDS
HSD17B12
HSD17B3
HSD17B4
HSD17B8
HTD2
LTA4H
LTC4S
MAPKAPK2
MCAT
MCEE
MECR
MID1IP1
MLYCD
MMAA
MMUT
MORC2
NDUFAB1
NUDT19
NUDT7
OLAH
PCCA
PCCB
PCTP
PECR
PHYH
PLA2G4A
PON1
PON2
PON3
PPARD
PPT1
PPT2
PRKAA2
PRKAB2
PRKAG2
PRXL2B
PTGDS
PTGES
PTGES2
PTGES3
PTGIS
PTGR1
PTGR2
PTGS1
PTGS2
RXRA
SCD
SCD5
SCP2
SLC22A5
SLC25A1
SLC25A17
SLC25A20
SLC27A2
SLC27A3
TBXAS1
TECR
TECRL
THEM4
THEM5
THRSP
AADAT
ACO2
ACSS1
ADIPOR2
ADSL
ALAD
ALDH1A1
ALDH3A1
ALDOA
AOC3
APEX1
AQP7
AUH
BCKDHB
BLVRA
BMPR1B
BPHL
CA2
CA4
CA6
CBR3
CCDC58
CD1D
CD36
CEL
CIDEA
CPOX
CRYZ
D2HGDH
DHCR24
DLD
DLST
ECH1
ENO2
ENO3
EPHX1
ERP29
ETFDH
FABP1
FABP2
FH
FMO1
G0S2
GABARAPL1
GAD2
GAPDHS
GLUL
GPD1
GPD2
GRHPR
GSTZ1
H2AZ1
HCCS
HIBCH
HMGCL
HMGCS1
HMGCS2
HSD17B10
HSD17B11
HSD17B7
HSDL2
HSP90AA1
HSPH1
IDH1
IDH3B
IDH3G
IDI1
IL4I1
INMT
KMT5A
LDHA
LGALS1
MAOA
MDH1
MDH2
ME1
METAP1
MGLL
MIF
NBN
NCAPH2
NSDHL
NTHL1
ODC1
OSTC
PCBD1
PDHA1
PDHB
PPARA
PRDX6
PSME1
PTPRG
PTS
RAP1GDS1
RDH11
RDH16
REEP6
RETSAT
S100A10
SDHA
SDHC
SDHD
SERINC1
SMS
SUCLA2
SUCLG1
SUCLG2
TDO2
TP53INP2
UBE2L6
UGDH
UROD
UROS
VNN1
XIST
YWHAH

## Sheet: Table S2
Table S2. Clinical characteristics of patients with prostate cancer in the TCGA cohort.
Characteristic	Number	Percentage (%)
Age
≤58	144	0.377953
>58	237	0.622047
Gleason score
<8	228	0.598425
≥8	153	0.401575
PSA value
<0.1	164	0.430446
≥0.1	205	0.538058
Uknown	12	0.0314961
Pathologic T
T2	147	0.385827
T3	222	0.582677
T4	7	0.0183727
Uknown	5	0.0131234
Pathologic N
N0	276	0.724409
N1	56	0.146982
Uknown	49	0.128609
Biochemical Recurrence
No	357	0.937008
Yes	24	0.0629921
Recurrence free survival time (years, mean ± SD)	2.98 ± 2.17

## Sheet: Table S3
Table S3. Clinical characteristics of patients with prostate cancer in the GEO cohort.
Characteristic	Nunber	Percentage (%)
Gleason score
<8	76	0.844444
≥8	13	0.144444
Unknown	1	0.0111111
PSA at diagnosis
<7.7	44	0.488889
≥7.7	44	0.488889
Uknown	2	0.0222222
Pathology T
T0	1	0.0111111
T2	47	0.522222
T3	42	0.466667
Biochemical Recurrence
No	46	0.511111
Yes	44	0.488889
Recurrence free survival time (years, mean ± SD)	4.17 ± 2.79

## Sheet: Table S4
Table S4. The table of differentially expressed fatty acid-related genes between tumor and normal cases in the TCGA cohort.
Gene name	logFC	t	P.Value	FDR	B
PON3	-0.858316	-13.0111	6.74e-33	2.07e-30	63.9457
GPX2	-2.45056	-11.8677	2.55e-28	3.92e-26	53.5224
AMACR	2.78018	11.5496	4.4e-27	4.52e-25	50.7064
ACOX2	-1.59557	-11.4429	1.13e-26	8.74e-25	49.7709
G0S2	-1.59587	-11.3483	2.62e-26	1.61e-24	48.9453
CYP4B1	-2.31965	-11.0833	2.67e-25	1.37e-23	46.6531
CYP4F22	-1.62435	-10.571	2.17e-23	9.56e-22	42.3076
CYP4F3	-0.554323	-10.538	2.87e-23	1.11e-21	42.0323
PTGS1	-1.84636	-10.4881	4.38e-23	1.5e-21	41.6161
ME1	-1.42648	-10.4063	8.73e-23	2.69e-21	40.9359
ACOT11	-0.724526	-10.2181	4.2e-22	1.18e-20	39.3847
ALDH3A1	-1.00068	-10.1448	7.72e-22	1.98e-20	38.7854
PLA2G4A	-1.3333	-9.94514	3.99e-21	9.45e-20	37.1656
ACSS1	0.832609	9.82843	1.03e-20	2.27e-19	36.2281
ACSF2	-1.35328	-9.80758	1.22e-20	2.51e-19	36.0614
NUDT19	0.666602	9.39921	3.21e-19	6.17e-18	32.8418
ALAD	-0.912341	-9.35993	4.37e-19	7.92e-18	32.5368
CRYZ	-0.836649	-9.16849	1.95e-18	3.34e-17	31.0627
HACD1	-1.00228	-9.00145	7.09e-18	1.15e-16	29.7932
ACACB	-0.905171	-8.87821	1.82e-17	2.8e-16	28.8668
FAAH	0.963845	8.84314	2.37e-17	3.48e-16	28.6048
MCAT	0.534746	8.77417	4e-17	5.6e-16	28.0917
HACD4	-0.796456	-8.71658	6.17e-17	8.26e-16	27.6653
ACSL4	-1.08585	-8.66043	9.39e-17	1.21e-15	27.2515
FASN	1.40426	8.54306	2.25e-16	2.77e-15	26.3926
ACSL6	-0.790865	-8.30625	1.28e-15	1.51e-14	24.6852
ENO2	-0.890758	-8.24863	1.94e-15	2.21e-14	24.2749
PTS	0.562897	8.14277	4.16e-15	4.42e-14	23.5267
ADH1B	-0.96671	-7.96521	1.47e-14	1.51e-13	22.2877
PTGS2	-1.79173	-7.72977	7.6e-14	7.55e-13	20.6763
ACAA2	-0.844145	-7.72169	8.03e-14	7.73e-13	20.6216
INMT	-1.14112	-7.69733	9.5e-14	8.87e-13	20.4571
ECI2	0.63925	7.60659	1.77e-13	1.6e-12	19.8478
CPT1B	0.666112	7.50394	3.55e-13	3.13e-12	19.1651
SDHD	-0.50952	-7.47196	4.41e-13	3.77e-12	18.9538
ALDH2	-1.00809	-7.43325	5.72e-13	4.76e-12	18.6991
DECR2	0.640382	7.38019	8.15e-13	6.61e-12	18.3515
FADS1	-1.01644	-7.32073	1.21e-12	9.32e-12	17.9644
BPHL	0.555608	7.2289	2.22e-12	1.67e-11	17.3713
PTGIS	-1.20656	-7.03271	7.95e-12	5.83e-11	16.1238
SLC27A2	0.926979	6.94455	1.4e-11	9.78e-11	15.5721
FADS2	-1.57849	-6.84119	2.69e-11	1.8e-10	14.9324
SCD5	-0.883142	-6.83242	2.84e-11	1.86e-10	14.8786
PTGDS	-1.48493	-6.79871	3.51e-11	2.25e-10	14.6718
NUDT7	-0.520751	-6.76172	4.43e-11	2.78e-10	14.4459
GSTZ1	0.572823	6.74156	5.02e-11	3.09e-10	14.3231
CEL	-0.936439	-6.6667	7.99e-11	4.82e-10	13.8701
GLUL	-0.581858	-6.64829	8.95e-11	5.3e-10	13.7593
D2HGDH	0.621599	6.51394	2.04e-10	1.16e-09	12.9584
THRSP	-0.615762	-6.48348	2.45e-10	1.37e-09	12.7786
LGALS1	-0.870639	-6.3615	5.09e-10	2.75e-09	12.0659
AOC3	-0.993762	-6.26614	8.95e-10	4.52e-09	11.5165
CYP2J2	1.09768	6.12887	1.99e-09	9.74e-09	10.7378
CA4	-0.819396	-6.10273	2.32e-09	1.12e-08	10.5911
ACACA	0.67846	6.02642	3.59e-09	1.7e-08	10.166
PTGES	-0.974441	-5.83626	1.05e-08	4.82e-08	9.12645
CROT	-0.549962	-5.73612	1.82e-08	8.13e-08	8.59047
AADAT	0.801458	5.65721	2.8e-08	1.21e-07	8.17372
SMS	0.95536	5.52684	5.64e-08	2.38e-07	7.4961
TP53INP2	-0.525676	-5.4704	7.61e-08	3.04e-07	7.20698
CRAT	0.649283	5.46453	7.85e-08	3.1e-07	7.17704
ELOVL7	0.816236	5.24273	2.48e-07	9.31e-07	6.0671
ACLY	0.620877	5.12965	4.39e-07	1.61e-06	5.51677
ALOX15	1.23657	5.02794	7.27e-07	2.6e-06	5.03089
CA2	-0.901964	-4.89448	1.39e-06	4.77e-06	4.40643
CD36	-0.595623	-4.88561	1.45e-06	4.92e-06	4.36545
HMGCS1	-0.629322	-4.88183	1.48e-06	4.96e-06	4.34801
CBR3	0.69556	4.67918	3.86e-06	1.22e-05	3.43087
MIF	0.528324	4.63186	4.8e-06	1.51e-05	3.22175
REEP6	0.533762	4.60578	5.41e-06	1.68e-05	3.10733
ODC1	0.630209	4.49359	9e-06	2.72e-05	2.62176
BMPR1B	0.622358	4.4898	9.15e-06	2.74e-05	2.60554
DHCR24	0.688885	4.43603	1.16e-05	3.41e-05	2.37687
ELOVL2	0.886074	4.20068	3.23e-05	8.97e-05	1.40568
ALDH1A1	-0.754268	-3.53523	0.000451339	0.00107762	-1.07378
ADH1C	-0.507731	-3.29047	0.00108198	0.00238036	-1.88463
CYP4F8	-0.774152	-2.59766	0.00970604	0.0176891	-3.87755
CYP4F2	-0.570289	-2.35835	0.0188002	0.0329003	-4.46046

## Sheet: Table S5
Table S5. The table of differentially expressed genes between high- and low-risk subgroups in the TCGA cohort.
Gene name	logFC	t	P.Value	FDR	B
CHKB-CPT1B	0.827688	10.138	1.54e-21	5.04e-18	38.152
EME1	0.586638	9.73478	3.83e-20	7.5e-17	35.0206
CPT1B	0.786626	9.69413	5.28e-20	9.39e-17	34.7091
SPDYA	0.629318	9.65194	7.35e-20	1.05e-16	34.3865
TINCR	-0.573916	-9.45432	3.42e-19	3.27e-16	32.887
KCTD14	-0.815553	-9.38397	5.89e-19	4.8e-16	32.3578
CACNA1D	0.677654	9.23457	1.85e-18	1.16e-15	31.2421
POLQ	0.709235	9.17223	2.98e-18	1.54e-15	30.7798
FAM227A	0.565004	9.1722	2.98e-18	1.54e-15	30.7796
GTSE1	0.725686	9.12129	4.38e-18	2.14e-15	30.4036
B4GALNT4	0.529012	9.10189	5.08e-18	2.36e-15	30.2606
AL121845.3	0.606658	9.05688	7.13e-18	3.17e-15	29.9298
CA2	0.800687	9.05137	7.43e-18	3.23e-15	29.8893
CASKIN1	0.656502	9.04312	7.91e-18	3.36e-15	29.8289
NUF2	0.686836	9.02406	9.13e-18	3.72e-15	29.6892
DPYS	-1.4872	-8.62928	1.71e-16	3.97e-14	26.8396
CELSR3	0.838922	8.87233	2.84e-17	8.96e-15	28.5841
CYP4F2	-1.32986	-6.80794	3.87e-11	1.3e-09	14.8737
CENPE	0.609711	8.8033	4.74e-17	1.38e-14	28.0854
ITGA10	0.548311	8.76977	6.08e-17	1.72e-14	27.8441
CCNE2	0.517632	8.74514	7.29e-17	1.94e-14	27.6672
PHYHIPL	-0.778499	-8.66414	1.32e-16	3.23e-14	27.0878
SLC7A4	-1.2893	-7.68936	1.28e-13	1.04e-11	20.4083
CACNG4	-0.717937	-8.60673	2.01e-16	4.63e-14	26.6793
ORC6	0.53728	8.59394	2.21e-16	4.8e-14	26.5886
FAM72B	0.630444	8.57264	2.58e-16	5.42e-14	26.4377
C2orf92	0.582328	8.51334	3.97e-16	8e-14	26.0187
MAMDC4	0.598384	8.49745	4.45e-16	8.88e-14	25.9069
KIF4A	0.70979	8.45818	5.91e-16	1.14e-13	25.6309
TICRR	0.572939	8.43539	6.97e-16	1.31e-13	25.4711
DNMT3B	0.553097	8.42483	7.52e-16	1.4e-13	25.3972
TROAP	0.678724	8.40458	8.7e-16	1.6e-13	25.2556
KIF18B	0.764611	8.32541	1.53e-15	2.63e-13	24.7043
MSH5	0.614959	8.31597	1.64e-15	2.74e-13	24.6388
GPC2	0.687929	8.26754	2.32e-15	3.65e-13	24.3036
COL4A6	-0.736779	-8.26532	2.35e-15	3.68e-13	24.2882
NCAPG	0.678221	8.25971	2.45e-15	3.78e-13	24.2495
AL136295.5	0.515867	8.25915	2.46e-15	3.78e-13	24.2456
KIF14	0.737762	8.25432	2.54e-15	3.86e-13	24.2123
CENPF	0.6742	8.23413	2.93e-15	4.25e-13	24.0731
SRCIN1	0.527054	8.19653	3.83e-15	5.47e-13	23.8145
HPSE2	-0.774086	-8.192	3.95e-15	5.56e-13	23.7834
BUB1B	0.567216	8.18175	4.25e-15	5.94e-13	23.7131
MELK	0.649975	8.14835	5.38e-15	7.31e-13	23.4843
OIP5	0.516167	8.14299	5.59e-15	7.53e-13	23.4477
RSKR	0.525188	8.11273	6.91e-15	9.11e-13	23.2411
CCK	-1.28674	-7.61178	2.16e-13	1.58e-11	19.9011
GLB1L3	-0.942733	-8.08362	8.47e-15	1.08e-12	23.0429
WDR97	0.863133	8.07164	9.21e-15	1.15e-12	22.9614
MKI67	0.559841	8.06459	9.68e-15	1.18e-12	22.9135
ESPL1	0.658922	8.0614	9.9e-15	1.19e-12	22.8919
CCBE1	-0.930454	-8.03575	1.18e-14	1.39e-12	22.718
NEK2	0.745747	8.02947	1.24e-14	1.44e-12	22.6755
ASPM	0.739719	8.00304	1.49e-14	1.7e-12	22.4968
IGSF1	-0.994419	-7.94956	2.15e-14	2.34e-12	22.1365
SRARP	-1.22613	-6.36546	5.61e-10	1.31e-08	12.2929
C3orf70	-0.537576	-7.88869	3.28e-14	3.36e-12	21.7285
PPARGC1A	-0.757657	-7.88545	3.35e-14	3.4e-12	21.7069
LHX4	0.659391	7.87248	3.67e-14	3.67e-12	21.6203
P3H2	-0.602993	-7.86396	3.89e-14	3.84e-12	21.5634
SRD5A2	-0.82404	-7.86339	3.9e-14	3.84e-12	21.5596
SPATC1	0.639782	7.85987	4e-14	3.91e-12	21.5361
PDE11A	-0.87468	-7.84389	4.46e-14	4.34e-12	21.4297
CACNG1	-1.21009	-9.01989	9.42e-18	3.76e-15	29.6586
SKA3	0.571022	7.77712	7.04e-14	6.32e-12	20.9866
DEPDC1B	0.666995	7.74962	8.49e-14	7.52e-12	20.8049
SLC5A8	-1.20685	-7.74226	8.93e-14	7.8e-12	20.7563
PLK1	0.524913	7.74224	8.93e-14	7.8e-12	20.7562
CCDC178	-0.760162	-7.73552	9.35e-14	8.09e-12	20.7119
IQGAP3	0.65255	7.7321	9.57e-14	8.24e-12	20.6894
MMP11	0.557281	7.71704	1.06e-13	8.93e-12	20.5902
APLN	0.518583	7.70105	1.18e-13	9.79e-12	20.485
C2orf88	-0.742629	-7.6983	1.2e-13	9.89e-12	20.467
AC068946.1	0.51445	7.69312	1.25e-13	1.02e-11	20.433
SHISA9	-1.17288	-6.86328	2.75e-11	9.95e-10	15.2061
LIME1	0.575644	7.66801	1.48e-13	1.17e-11	20.2683
TUBB3	0.793878	7.66062	1.55e-13	1.22e-11	20.22
UBE2C	0.510114	7.64798	1.69e-13	1.3e-11	20.1373
ATP1A2	-0.66709	-7.64671	1.7e-13	1.31e-11	20.129
RBFOX3	-0.970248	-7.6443	1.73e-13	1.32e-11	20.1133
STX16-NPEPL1	0.758121	7.61886	2.06e-13	1.53e-11	19.9472
LY6G6D	-1.17192	-7.91281	2.78e-14	2.9e-12	21.8899
KIF18A	0.517377	7.59425	2.42e-13	1.74e-11	19.787
SLC9A5	0.50798	7.58103	2.65e-13	1.89e-11	19.7011
FAM124A	-0.533676	-7.56477	2.95e-13	2.08e-11	19.5956
TENT5B	-0.618563	-7.5527	3.2e-13	2.22e-11	19.5174
PLEKHD1	0.561866	7.54222	3.43e-13	2.35e-11	19.4495
ADRA1D	-0.964925	-7.52329	3.9e-13	2.64e-11	19.3271
TOP2A	0.561575	7.49196	4.8e-13	3.2e-11	19.1251
IMPG1	0.690929	7.48863	4.91e-13	3.26e-11	19.1037
CKM	-1.1481	-7.20816	3.08e-12	1.54e-10	17.3239
CCDC78	0.799447	7.47198	5.48e-13	3.58e-11	18.9967
RNASE4	-0.510365	-7.45156	6.27e-13	3.97e-11	18.8656
NEIL3	0.700695	7.44666	6.48e-13	4.07e-11	18.8341
CENPK	0.525854	7.43767	6.87e-13	4.28e-11	18.7766
CENPI	0.584175	7.41291	8.09e-13	4.96e-11	18.6182
RND2	-0.664845	-7.40632	8.45e-13	5.12e-11	18.5761
RAD54L	0.578243	7.40316	8.63e-13	5.21e-11	18.5559
PHYHD1	-0.57904	-7.40031	8.79e-13	5.28e-11	18.5378
LGR6	-0.930928	-7.39691	8.99e-13	5.38e-11	18.5161
LY6G5B	0.60605	7.36489	1.11e-12	6.52e-11	18.3122
CYP11A1	-0.767668	-7.35229	1.21e-12	7.02e-11	18.2321
MEX3A	0.648513	7.35128	1.21e-12	7.04e-11	18.2258
ANPEP	-0.797101	-7.35082	1.22e-12	7.04e-11	18.2228
DLGAP5	0.65904	7.33921	1.31e-12	7.55e-11	18.1492
AC011511.1	0.570071	7.33265	1.37e-12	7.82e-11	18.1076
LY6G6F-LY6G6D	-0.913263	-7.32519	1.44e-12	8.16e-11	18.0604
AL133352.1	0.52263	7.29859	1.71e-12	9.41e-11	17.8921
NECAB1	-0.649588	-7.28984	1.81e-12	9.88e-11	17.8369
ANO4	-0.730075	-7.2584	2.22e-12	1.18e-10	17.6389
SLC2A4	-0.638177	-7.25321	2.3e-12	1.22e-10	17.6063
RTEL1-TNFRSF6B	0.514365	7.25264	2.31e-12	1.22e-10	17.6027
STAC	-0.858566	-7.25212	2.32e-12	1.22e-10	17.5994
FOXH1	0.552936	7.22056	2.84e-12	1.46e-10	17.4014
ZNF559-ZNF177	0.503	7.21869	2.88e-12	1.46e-10	17.3897
LDB3	-0.607422	-7.21645	2.92e-12	1.47e-10	17.3757
MGAT5B	0.770888	7.21394	2.97e-12	1.5e-10	17.36
VSTM2A	-1.13645	-5.39845	1.19e-07	1.37e-06	7.14976
CENPA	0.669304	7.20234	3.2e-12	1.6e-10	17.2874
CPNE6	-1.08084	-7.10569	5.95e-12	2.73e-10	16.6863
KIF15	0.554354	7.18453	3.59e-12	1.77e-10	17.1762
RPE65	-1.0192	-6.39986	4.58e-10	1.1e-08	12.4886
FOXN1	-0.712338	-7.17921	3.71e-12	1.81e-10	17.143
CD38	-0.965565	-7.17476	3.82e-12	1.86e-10	17.1153
TACR2	-0.594471	-7.15338	4.38e-12	2.1e-10	16.9822
NCMAP	-0.712712	-7.14459	4.64e-12	2.21e-10	16.9275
TAFA1	-0.704135	-7.13291	5e-12	2.35e-10	16.855
LENEP	0.851086	7.12937	5.11e-12	2.4e-10	16.833
MAB21L1	-0.962295	-7.12776	5.16e-12	2.42e-10	16.8231
PLCL1	-0.651831	-7.1153	5.59e-12	2.6e-10	16.7459
MT1M	-0.528222	-7.11199	5.71e-12	2.64e-10	16.7253
PLA2G2C	-0.570715	-7.10922	5.81e-12	2.68e-10	16.7082
EDN3	-1.01398	-6.72513	6.45e-11	1.98e-09	14.3803
PNCK	-0.537952	-7.10197	6.09e-12	2.78e-10	16.6633
NKAIN1	0.952186	7.09406	6.41e-12	2.91e-10	16.6144
FBP2	0.757679	7.09274	6.46e-12	2.92e-10	16.6063
TMEM249	0.588286	7.08783	6.67e-12	3e-10	16.5759
KRTAP5-1	1.02458	8.85794	3.16e-17	9.66e-15	28.48
AFF3	-0.503752	-7.06686	7.62e-12	3.36e-10	16.4466
UBXN10	-0.71544	-7.0608	7.92e-12	3.47e-10	16.4093
LEAP2	0.516046	7.04505	8.75e-12	3.77e-10	16.3123
KIF20A	0.602045	7.04379	8.82e-12	3.79e-10	16.3046
JPH4	-0.689677	-7.03876	9.11e-12	3.89e-10	16.2737
PAK5	-0.721062	-7.03459	9.35e-12	3.98e-10	16.2481
SEMA4G	-0.584678	-7.0222	1.01e-11	4.26e-10	16.172
PRSS53	0.531386	7.02065	1.02e-11	4.3e-10	16.1626
FAT3	-0.72806	-7.01125	1.08e-11	4.52e-10	16.105
FGFR2	-0.571951	-7.00743	1.11e-11	4.61e-10	16.0816
MYT1	0.954496	7.00595	1.12e-11	4.65e-10	16.0725
TMEM35A	-0.688343	-7.00082	1.16e-11	4.77e-10	16.0411
AC090004.1	0.551908	6.99871	1.17e-11	4.81e-10	16.0282
CDK3	0.575195	6.99796	1.18e-11	4.83e-10	16.0236
CA14	-0.714924	-6.97367	1.37e-11	5.51e-10	15.8753
SCNN1D	0.567358	6.96477	1.45e-11	5.77e-10	15.821
NAT1	-0.726342	-6.96369	1.46e-11	5.8e-10	15.8144
ALOX15B	-0.844489	-6.95937	1.5e-11	5.92e-10	15.7881
ZDHHC11B	0.584675	6.95353	1.56e-11	6.12e-10	15.7526
SH3RF2	-0.606664	-6.92602	1.86e-11	7.1e-10	15.5854
HIF3A	-0.723282	-6.91382	2e-11	7.59e-10	15.5114
SEC31B	0.572519	6.89658	2.23e-11	8.36e-10	15.4071
KNL1	0.572174	6.8878	2.36e-11	8.78e-10	15.354
COL10A1	0.990939	6.88173	2.45e-11	9.02e-10	15.3173
NRG2	-0.708368	-6.87612	2.54e-11	9.29e-10	15.2835
PYGM	-0.577442	-6.86724	2.68e-11	9.76e-10	15.2299
AQP5	-0.822629	-6.86395	2.73e-11	9.94e-10	15.2101
LRRC36	0.599257	6.8637	2.74e-11	9.94e-10	15.2086
ALOX15	1.02734	5.29772	1.99e-07	2.14e-06	6.65511
ACTC1	-0.990282	-6.86233	2.76e-11	9.99e-10	15.2004
EGFL8	0.530189	6.86021	2.8e-11	1.01e-09	15.1876
ITGBL1	0.829552	6.84934	3e-11	1.07e-09	15.1222
H3C12	0.779614	6.84663	3.05e-11	1.08e-09	15.1059
MPP2	-0.548174	-6.83548	3.27e-11	1.14e-09	15.0389
CDC25C	0.585707	6.83299	3.32e-11	1.16e-09	15.0239
LDLRAD1	-0.918107	-6.81053	3.81e-11	1.29e-09	14.8892
SLC44A5	1.03415	6.36493	5.63e-10	1.31e-08	12.2899
PILRB	0.620744	6.80227	4.01e-11	1.34e-09	14.8398
RAB9B	-0.50663	-6.8019	4.02e-11	1.34e-09	14.8376
VGLL3	-0.937282	-6.79625	4.16e-11	1.39e-09	14.8038
LRRC31	0.99744	6.77578	4.73e-11	1.55e-09	14.6816
IL17RE	-0.519908	-6.77366	4.79e-11	1.56e-09	14.6689
GSTM5	-0.55241	-6.77096	4.87e-11	1.58e-09	14.6528
RNF112	-0.642349	-6.76337	5.1e-11	1.63e-09	14.6076
C8orf88	-0.578378	-6.76026	5.2e-11	1.65e-09	14.5891
AC233992.2	0.591612	6.75551	5.35e-11	1.69e-09	14.5608
COL11A2	0.56167	6.74384	5.75e-11	1.8e-09	14.4914
DPT	-0.662354	-6.73973	5.9e-11	1.84e-09	14.467
PEBP4	-0.658693	-6.7371	6e-11	1.86e-09	14.4513
ONECUT2	0.841981	6.73695	6e-11	1.86e-09	14.4505
SLC23A3	0.573806	6.72915	6.3e-11	1.95e-09	14.4042
KY	-0.687602	-6.72798	6.34e-11	1.96e-09	14.3972
ADAM7	1.04423	5.64822	3.18e-08	4.31e-07	8.41038
MAMLD1	-0.512974	-6.72061	6.64e-11	2.03e-09	14.3535
OR51D1	0.779102	6.71174	7.01e-11	2.12e-09	14.301
QPRT	-0.51115	-6.70137	7.47e-11	2.25e-09	14.2397
TSLP	-0.628014	-6.67886	8.57e-11	2.52e-09	14.1067
TCEAL2	-0.517797	-6.66104	9.55e-11	2.78e-09	14.0017
MEIS3	-0.535861	-6.65044	1.02e-10	2.95e-09	13.9394
ASPA	-0.691178	-6.64675	1.04e-10	3.01e-09	13.9177
SHCBP1	0.526151	6.63856	1.1e-10	3.15e-09	13.8696
PPP1R1A	-0.709525	-6.63331	1.13e-10	3.24e-09	13.8388
UHRF1	0.519648	6.62533	1.19e-10	3.38e-09	13.792
ARHGDIG	0.81978	6.6097	1.3e-10	3.66e-09	13.7005
ZNF695	0.502353	6.60903	1.31e-10	3.66e-09	13.6966
IL1RL2	-0.753815	-6.6078	1.32e-10	3.68e-09	13.6894
LINC00634	0.584671	6.58846	1.48e-10	4.06e-09	13.5764
AMH	0.947795	6.57402	1.62e-10	4.39e-09	13.4923
HABP2	0.875857	6.54475	1.93e-10	5.15e-09	13.3221
GDF10	-0.83087	-6.5372	2.02e-10	5.36e-09	13.2782
HMMR	0.552434	6.53575	2.04e-10	5.4e-09	13.2698
MYOCD	-0.658238	-6.53226	2.08e-10	5.49e-09	13.2496
SGO1	0.582342	6.5304	2.1e-10	5.54e-09	13.2389
BUB1	0.555341	6.51753	2.27e-10	5.91e-09	13.1644
GJC3	-0.515123	-6.50621	2.43e-10	6.28e-09	13.0989
LGI3	-0.690841	-6.4969	2.57e-10	6.59e-09	13.0451
LDAH	-0.55419	-6.49284	2.64e-10	6.73e-09	13.0217
LSAMP	-0.535676	-6.48944	2.69e-10	6.86e-09	13.0021
PLA2G4B	0.567823	6.47962	2.85e-10	7.25e-09	12.9455
CTHRC1	0.514171	6.47357	2.96e-10	7.46e-09	12.9107
LBX2	0.595438	6.47217	2.98e-10	7.51e-09	12.9026
ULBP1	0.665181	6.4691	3.04e-10	7.61e-09	12.885
PGAP4	-0.604382	-6.45907	3.22e-10	8.03e-09	12.8274
SLC22A15	0.508253	6.45343	3.33e-10	8.28e-09	12.795
RDM1	0.611939	6.4496	3.41e-10	8.46e-09	12.773
PIK3C2G	-0.694664	-6.44877	3.43e-10	8.49e-09	12.7682
SCN2B	-0.655099	-6.44074	3.6e-10	8.86e-09	12.7222
MNX1	1.04545	7.19442	3.36e-12	1.67e-10	17.2379
C20orf204	0.517965	6.40438	4.46e-10	1.07e-08	12.5143
CYP3A5	-0.757836	-6.40037	4.57e-10	1.09e-08	12.4915
NKX6-1	1.19087	7.08429	6.82e-12	3.05e-10	16.5541
CMTM5	-0.673897	-6.39593	4.69e-10	1.12e-08	12.4662
SLC10A4	0.653258	6.39525	4.71e-10	1.12e-08	12.4623
IP6K3	-0.854092	-6.38764	4.92e-10	1.17e-08	12.4189
PAGE4	-0.683128	-6.36718	5.55e-10	1.3e-08	12.3026
PAX1	1.21121	7.48598	4.99e-13	3.3e-11	19.0866
NKX2-2	1.21742	7.18208	3.64e-12	1.79e-10	17.1609
TMEM132C	-0.741788	-6.36258	5.71e-10	1.33e-08	12.2765
HAGHL	0.557167	6.35872	5.84e-10	1.35e-08	12.2547
PDIA2	1.24466	7.80433	5.85e-14	5.45e-12	21.1668
BEX1	-0.758036	-6.34714	6.25e-10	1.43e-08	12.189
SCIN	-0.651948	-6.34046	6.5e-10	1.48e-08	12.1512
TLCD3B	0.588459	6.33874	6.57e-10	1.49e-08	12.1415
NPIPB3	0.50787	6.3229	7.2e-10	1.61e-08	12.0519
EVX2	-0.751435	-6.30795	7.86e-10	1.73e-08	11.9676
NKAPL	-0.568794	-6.30672	7.92e-10	1.74e-08	11.9607
ASIC2	0.908554	6.29455	8.5e-10	1.87e-08	11.8921
CLEC18B	0.559311	6.29295	8.58e-10	1.88e-08	11.8832
HASPIN	0.543583	6.27668	9.44e-10	2.04e-08	11.7917
KCNB1	-0.531739	-6.27477	9.54e-10	2.06e-08	11.7811
BARX1	0.830901	6.25602	1.06e-09	2.27e-08	11.676
VIT	-0.723575	-6.2463	1.13e-09	2.38e-08	11.6216
PLAAT5	-0.658269	-6.22457	1.28e-09	2.67e-08	11.5003
C14orf39	0.536627	6.22098	1.3e-09	2.72e-08	11.4803
LIX1	-0.942094	-6.21909	1.32e-09	2.74e-08	11.4698
NDP	-0.673707	-6.21297	1.37e-09	2.83e-08	11.4357
TCEAL5	-0.577673	-6.19879	1.48e-09	3.04e-08	11.3568
MISP	-0.578065	-6.19099	1.55e-09	3.16e-08	11.3135
SCGB1D2	-0.765114	-6.17384	1.71e-09	3.44e-08	11.2184
FAM181B	-0.511639	-6.17128	1.74e-09	3.48e-08	11.2042
NCAM1	-0.683905	-6.1692	1.76e-09	3.52e-08	11.1927
CKAP2L	0.580604	6.16495	1.8e-09	3.6e-08	11.1692
CDH7	0.83891	6.1578	1.88e-09	3.72e-08	11.1297
GRIA3	-0.686613	-6.15686	1.89e-09	3.73e-08	11.1245
LRRC7	0.723325	6.14575	2.01e-09	3.95e-08	11.0632
OMP	0.817341	6.14519	2.02e-09	3.96e-08	11.0601
LRCH2	-0.508163	-6.13772	2.11e-09	4.12e-08	11.0189
NIPAL4	-0.621734	-6.13454	2.14e-09	4.19e-08	11.0013
PLPP4	0.671167	6.13191	2.18e-09	4.24e-08	10.9869
TRIM46	0.581546	6.10866	2.49e-09	4.76e-08	10.859
C3orf14	-0.644937	-6.10119	2.59e-09	4.96e-08	10.818
EN2	0.940289	6.09544	2.68e-09	5.07e-08	10.7865
SHISA3	0.677004	6.09025	2.76e-09	5.21e-08	10.7581
YJEFN3	0.562209	6.0842	2.86e-09	5.34e-08	10.725
KHDRBS3	0.507374	6.05995	3.28e-09	6.06e-08	10.5925
SLC16A8	0.56284	6.05636	3.35e-09	6.16e-08	10.5729
SLC35F1	-0.671186	-6.04867	3.5e-09	6.4e-08	10.531
ANGPTL1	-0.619189	-6.04632	3.54e-09	6.45e-08	10.5182
ASB12	-0.521617	-6.04183	3.63e-09	6.61e-08	10.4938
STPG3	0.645183	6.03528	3.77e-09	6.81e-08	10.4582
IL31RA	-0.760021	-6.03269	3.83e-09	6.9e-08	10.4441
SALL4	0.608163	6.03153	3.85e-09	6.92e-08	10.4378
BMPER	-0.715684	-6.02429	4.01e-09	7.18e-08	10.3985
ADRA1A	-0.730123	-6.01429	4.24e-09	7.56e-08	10.3442
RBFOX1	-0.60082	-6.01418	4.25e-09	7.56e-08	10.3436
F5	0.637471	6.01291	4.28e-09	7.61e-08	10.3367
SLC2A5	-0.701842	-6.01089	4.33e-09	7.69e-08	10.3258
P2RY2	-0.608566	-6.00315	4.52e-09	7.99e-08	10.2839
NOX4	0.639207	5.99836	4.64e-09	8.16e-08	10.258
B3GALT2	-0.633848	-5.99662	4.69e-09	8.23e-08	10.2486
RSPO2	-0.745732	-5.98277	5.07e-09	8.84e-08	10.1738
ISX	0.617638	5.97509	5.29e-09	9.15e-08	10.1324
FAP	0.552566	5.97185	5.39e-09	9.29e-08	10.1149
E2F8	0.560969	5.96137	5.71e-09	9.79e-08	10.0584
ACER1	-0.686473	-5.95908	5.79e-09	9.9e-08	10.0461
HMGCLL1	-0.676685	-5.94614	6.22e-09	1.06e-07	9.97659
MORN5	-0.747805	-5.94413	6.29e-09	1.07e-07	9.96581
MYADML2	0.59371	5.94236	6.35e-09	1.08e-07	9.9563
HOXD11	-0.704721	-5.93045	6.79e-09	1.14e-07	9.89244
FGF7	-0.576004	-5.92825	6.88e-09	1.15e-07	9.88064
NRK	-0.666066	-5.92277	7.09e-09	1.18e-07	9.85131
TMEM252	-0.813711	-5.91585	7.37e-09	1.22e-07	9.8143
EXO1	0.511648	5.90989	7.61e-09	1.26e-07	9.78241
ANGPT1	-0.541769	-5.90975	7.62e-09	1.26e-07	9.78169
ULBP2	0.757881	5.90924	7.64e-09	1.26e-07	9.77896
HJURP	0.505996	5.90522	7.81e-09	1.29e-07	9.75751
SLC18A3	0.933354	5.90265	7.93e-09	1.31e-07	9.74379
DLL3	0.71161	5.89292	8.37e-09	1.37e-07	9.69189
SULT4A1	0.962424	5.89246	8.39e-09	1.37e-07	9.68945
PRKCB	-0.543418	-5.88123	8.93e-09	1.45e-07	9.62964
CA9	-0.574904	-5.88008	8.98e-09	1.46e-07	9.62352
HPD	-0.511311	-5.87019	9.49e-09	1.53e-07	9.57095
PON3	-0.579567	-5.86885	9.56e-09	1.54e-07	9.56382
MCF2	-0.502602	-5.8626	9.9e-09	1.59e-07	9.53065
GUCY2D	-0.582882	-5.85714	1.02e-08	1.63e-07	9.50168
SCGB3A1	-0.749697	-5.85691	1.02e-08	1.63e-07	9.50045
SMIM17	0.508365	5.85196	1.05e-08	1.67e-07	9.47423
KCNF1	-0.548955	-5.8332	1.16e-08	1.81e-07	9.37493
PROM1	-0.813276	-5.82669	1.21e-08	1.87e-07	9.34058
LINGO3	0.503109	5.82488	1.22e-08	1.89e-07	9.331
MCM10	0.526923	5.82053	1.25e-08	1.93e-07	9.30806
ESM1	0.755793	5.81777	1.27e-08	1.95e-07	9.2935
SYT1	-0.628807	-5.81194	1.31e-08	2.01e-07	9.26274
AL163636.1	-0.543162	-5.80371	1.37e-08	2.09e-07	9.21942
FAM83C	-0.601604	-5.79877	1.41e-08	2.13e-07	9.19343
TERT	0.500892	5.79297	1.45e-08	2.19e-07	9.16296
MAGEB17	0.746861	5.78561	1.51e-08	2.28e-07	9.12429
CLVS2	-0.683644	-5.78515	1.51e-08	2.28e-07	9.12188
HHIPL2	-0.639582	-5.78248	1.54e-08	2.31e-07	9.10788
TBX5	-0.729122	-5.78044	1.55e-08	2.33e-07	9.09718
ASCL4	-0.503039	-5.77728	1.58e-08	2.37e-07	9.08064
SEMA3A	-0.577452	-5.77687	1.58e-08	2.37e-07	9.07843
FOXP2	-0.514161	-5.7767	1.59e-08	2.37e-07	9.07755
MAL	-0.67038	-5.75358	1.8e-08	2.66e-07	8.9566
ANKRD66	0.622274	5.75152	1.82e-08	2.68e-07	8.94583
LHX2	0.518465	5.74779	1.86e-08	2.73e-07	8.92636
KRT222	-0.585473	-5.74648	1.87e-08	2.74e-07	8.9195
DIRAS2	1.25035	8.09274	7.95e-15	1.03e-12	23.1049
CEND1	-0.524899	-5.73107	2.03e-08	2.95e-07	8.83917
P2RX5	0.533944	5.72567	2.09e-08	3.03e-07	8.81106
WIF1	-0.847009	-5.71945	2.17e-08	3.12e-07	8.77872
VSIG2	-0.578721	-5.71699	2.19e-08	3.16e-07	8.76593
COL23A1	-0.508388	-5.71411	2.23e-08	3.19e-07	8.75096
FOXD1	0.987775	5.71001	2.28e-08	3.26e-07	8.72969
PROK1	-0.779786	-5.69421	2.48e-08	3.51e-07	8.64775
TCEAL6	-0.591199	-5.69079	2.53e-08	3.56e-07	8.63003
SGCG	-0.688114	-5.6897	2.54e-08	3.58e-07	8.62443
MT1B	-0.956557	-5.68853	2.56e-08	3.6e-07	8.61838
HCAR1	-0.78199	-5.68433	2.62e-08	3.67e-07	8.59664
ADAD2	-0.512955	-5.68183	2.65e-08	3.71e-07	8.58371
SPATA18	-0.505297	-5.67216	2.8e-08	3.88e-07	8.53373
LY6D	-0.971943	-5.67097	2.81e-08	3.9e-07	8.5276
POTEH	-0.728428	-5.66569	2.9e-08	4e-07	8.50034
PROZ	0.60383	5.66393	2.92e-08	4.03e-07	8.49127
INSYN2B	-0.569434	-5.66198	2.95e-08	4.06e-07	8.48122
CST2	0.728501	5.66186	2.96e-08	4.06e-07	8.48061
ZNF215	-0.542862	-5.66126	2.96e-08	4.07e-07	8.47751
KANK4	-0.62405	-5.65965	2.99e-08	4.1e-07	8.46924
DNAH8	0.748768	5.65423	3.08e-08	4.21e-07	8.4413
FOXB2	1.26248	6.34855	6.2e-10	1.42e-08	12.197
PRIMA1	-0.53494	-5.63982	3.33e-08	4.5e-07	8.3672
SSTR1	0.551257	5.63369	3.44e-08	4.63e-07	8.33575
FEZF1	0.571052	5.63285	3.45e-08	4.64e-07	8.33141
SLC9A3	0.705255	5.62305	3.64e-08	4.85e-07	8.28117
NTRK3	-0.509932	-5.60847	3.93e-08	5.18e-07	8.20655
SMOC1	-0.533079	-5.60221	4.07e-08	5.34e-07	8.17456
KLK1	-0.586455	-5.59155	4.3e-08	5.61e-07	8.12013
BRINP3	-0.736776	-5.5622	5.03e-08	6.44e-07	7.97079
ANO5	-0.561219	-5.5518	5.32e-08	6.77e-07	7.91798
CCDC169	-0.856835	-5.54781	5.43e-08	6.88e-07	7.89778
BAIAP2L2	0.559412	5.54576	5.49e-08	6.95e-07	7.88738
ADCYAP1R1	-0.596824	-5.53047	5.95e-08	7.44e-07	7.81003
POTEM	-0.696753	-5.52939	5.98e-08	7.47e-07	7.80459
FOLR1	-0.771281	-5.52896	6e-08	7.49e-07	7.80243
SHISA2	0.619686	5.52821	6.02e-08	7.51e-07	7.79863
VSNL1	-0.738789	-5.52564	6.1e-08	7.6e-07	7.78563
AC007906.2	-0.627464	-5.52299	6.19e-08	7.69e-07	7.77226
SAPCD1	0.594709	5.51828	6.34e-08	7.85e-07	7.74853
DLX2	0.763732	5.51808	6.35e-08	7.85e-07	7.74749
GOLGA8A	0.527123	5.51126	6.58e-08	8.12e-07	7.71314
PRAME	0.983375	5.50702	6.73e-08	8.29e-07	7.69175
EFCAB1	-0.595026	-5.49808	7.06e-08	8.64e-07	7.64682
C16orf89	-0.522824	-5.48975	7.37e-08	8.98e-07	7.60494
ARSH	0.762633	5.48184	7.68e-08	9.31e-07	7.56523
MT1H	-0.56697	-5.47905	7.8e-08	9.42e-07	7.55126
SEC14L5	-0.514311	-5.47547	7.94e-08	9.58e-07	7.53329
CD300LG	-0.568336	-5.47022	8.16e-08	9.81e-07	7.507
NPPC	-0.974957	-5.46816	8.25e-08	9.91e-07	7.49672
ATP8B4	-0.543754	-5.46216	8.52e-08	1.02e-06	7.46668
HTRA4	0.51987	5.45061	9.05e-08	1.08e-06	7.40898
ASB5	-0.552577	-5.42777	1.02e-07	1.2e-06	7.2952
MT1A	-0.587571	-5.42749	1.02e-07	1.2e-06	7.29383
PCP4L1	-0.56831	-5.42401	1.04e-07	1.22e-06	7.2765
RGS17	0.541952	5.42347	1.04e-07	1.22e-06	7.27383
TRIM31	-0.524094	-5.40764	1.13e-07	1.31e-06	7.19526
PAK3	-0.531544	-5.40706	1.13e-07	1.32e-06	7.19238
B3GNT6	1.27502	5.74244	1.91e-08	2.79e-07	8.89842
MLNR	0.578658	5.39494	1.21e-07	1.39e-06	7.1324
HECW1	-0.617532	-5.39294	1.22e-07	1.4e-06	7.12249
DYTN	0.957706	5.39139	1.23e-07	1.41e-06	7.1148
BRSK2	0.734929	5.37605	1.33e-07	1.52e-06	7.03904
CRIP3	-0.562478	-5.37589	1.33e-07	1.52e-06	7.03828
SCART1	0.501807	5.37503	1.34e-07	1.52e-06	7.03405
AC244197.3	0.548015	5.37038	1.37e-07	1.55e-06	7.01112
MYH6	-0.725534	-5.36844	1.38e-07	1.57e-06	7.00156
SLC38A4	-0.807435	-5.35801	1.46e-07	1.64e-06	6.9502
NRG1	-0.593613	-5.35213	1.51e-07	1.68e-06	6.92129
CLCA2	-0.8634	-5.33983	1.6e-07	1.78e-06	6.86092
SLITRK6	-0.504357	-5.33636	1.63e-07	1.81e-06	6.8439
LCN2	-0.605677	-5.32219	1.76e-07	1.92e-06	6.77454
CASQ1	-0.622003	-5.31219	1.85e-07	2.01e-06	6.72568
HPDL	-0.570628	-5.31082	1.86e-07	2.02e-06	6.71902
TMEM132D	-0.675752	-5.3058	1.91e-07	2.06e-06	6.6945
C21orf62	-0.582054	-5.30177	1.95e-07	2.1e-06	6.67485
ANKRD34B	1.41033	6.42816	3.87e-10	9.47e-09	12.6502
COL11A1	0.670011	5.2975	1.99e-07	2.14e-06	6.65408
POF1B	-0.742452	-5.29451	2.02e-07	2.16e-06	6.63949
TNMD	-0.729063	-5.29229	2.05e-07	2.19e-06	6.62871
ATCAY	-0.616896	-5.28373	2.14e-07	2.26e-06	6.58707
COMP	0.510772	5.26235	2.38e-07	2.49e-06	6.48337
SLC24A2	0.593489	5.26053	2.4e-07	2.51e-06	6.47455
ZNF488	-0.518252	-5.25336	2.49e-07	2.58e-06	6.43985
NETO1	0.744977	5.2497	2.54e-07	2.62e-06	6.42216
ATP6V1G3	-0.648797	-5.24307	2.63e-07	2.69e-06	6.39014
HOXD13	-0.532442	-5.23547	2.73e-07	2.79e-06	6.35347
ATP8A2	0.888541	5.22701	2.85e-07	2.91e-06	6.31271
INHBA	0.50104	5.22422	2.89e-07	2.95e-06	6.2993
VEPH1	-0.525163	-5.20202	3.23e-07	3.24e-06	6.19265
ABO	-0.656479	-5.19834	3.29e-07	3.3e-06	6.17503
CPA6	-0.762254	-5.19299	3.38e-07	3.38e-06	6.14939
DRD1	-0.557961	-5.18999	3.43e-07	3.42e-06	6.135
DMBT1	-0.606679	-5.17872	3.63e-07	3.59e-06	6.08116
RPS4Y2	-0.724195	-5.17324	3.73e-07	3.68e-06	6.055
FGFBP1	-0.902895	-5.1559	4.07e-07	3.99e-06	5.97237
SLC25A48	-0.659959	-5.14156	4.37e-07	4.26e-06	5.90424
SLITRK4	-0.712223	-5.13008	4.63e-07	4.48e-06	5.84979
AMTN	-0.757629	-5.12876	4.66e-07	4.5e-06	5.84354
CERS3	-0.502726	-5.12784	4.68e-07	4.52e-06	5.83916
FOXD3	0.715749	5.12453	4.76e-07	4.58e-06	5.82352
ALX4	0.706381	5.12005	4.86e-07	4.66e-06	5.8023
SOHLH2	-0.821059	-5.11602	4.96e-07	4.74e-06	5.78325
DLGAP1	-0.609225	-5.11047	5.1e-07	4.86e-06	5.75705
C19orf67	0.505431	5.10742	5.18e-07	4.92e-06	5.74264
HPGD	-0.518674	-5.105	5.24e-07	4.96e-06	5.73123
ST8SIA6	-0.626014	-5.09403	5.53e-07	5.2e-06	5.67953
ODF3L2	0.612721	5.09129	5.61e-07	5.25e-06	5.66665
RDH16	-0.528504	-5.08012	5.92e-07	5.53e-06	5.61415
GDF5	-0.549483	-5.07912	5.95e-07	5.54e-06	5.60945
KIAA1210	-0.756224	-5.07559	6.06e-07	5.62e-06	5.59285
PDE1C	-0.507045	-5.06636	6.34e-07	5.86e-06	5.54958
C1QL1	-0.596856	-5.06372	6.42e-07	5.92e-06	5.53722
KCNH6	-0.587078	-5.06308	6.44e-07	5.94e-06	5.53422
GPX2	-0.58322	-5.06222	6.47e-07	5.95e-06	5.53019
UGT2B15	0.80111	5.05789	6.61e-07	6.06e-06	5.50992
KCNJ6	-0.553235	-5.04204	7.14e-07	6.48e-06	5.43586
PCYT1B	-0.516971	-5.03892	7.25e-07	6.56e-06	5.42131
CCDC60	-0.638316	-5.02778	7.66e-07	6.89e-06	5.36939
F2RL2	0.579529	5.02635	7.71e-07	6.94e-06	5.36276
CXCR2	-0.568481	-5.01925	7.98e-07	7.16e-06	5.32973
CHAT	0.51542	5.01482	8.16e-07	7.3e-06	5.30914
GJB4	-0.645376	-5.00242	8.67e-07	7.7e-06	5.25159
NKX2-1	0.931743	5.00216	8.68e-07	7.71e-06	5.25039
HOXD12	-0.633141	-4.99794	8.86e-07	7.83e-06	5.23086
KLK14	0.582663	4.99363	9.05e-07	7.98e-06	5.21091
IBSP	0.560492	4.9918	9.13e-07	8.04e-06	5.20246
FREM2	-0.595828	-4.98868	9.27e-07	8.16e-06	5.188
PCSK2	-0.565262	-4.98788	9.3e-07	8.18e-06	5.18431
RLN1	-0.88345	-4.98227	9.56e-07	8.39e-06	5.15838
FOXI1	-0.95065	-4.97152	1.01e-06	8.78e-06	5.10879
OLIG1	0.669953	4.96453	1.04e-06	9.04e-06	5.07661
IGF1	-0.522003	-4.95515	1.09e-06	9.43e-06	5.03347
EFNA2	0.703387	4.95467	1.09e-06	9.45e-06	5.03127
HGFAC	0.553897	4.95425	1.09e-06	9.46e-06	5.02932
FGF10	-0.595773	-4.94579	1.14e-06	9.82e-06	4.99047
PAH	-0.826393	-4.9388	1.18e-06	1.01e-05	4.95843
KIF25	0.576496	4.93169	1.22e-06	1.04e-05	4.92585
CERS1	0.520581	4.90196	1.41e-06	1.18e-05	4.79018
C10orf82	-0.64156	-4.88679	1.51e-06	1.26e-05	4.72121
CAPNS2	-0.839544	-4.88458	1.53e-06	1.27e-05	4.71117
ACTA1	-0.674176	-4.87913	1.57e-06	1.3e-05	4.68644
RYR2	-0.577133	-4.87589	1.59e-06	1.31e-05	4.67175
AC003002.2	0.521836	4.87383	1.61e-06	1.32e-05	4.66241
TMEM225B	-0.560776	-4.87013	1.64e-06	1.35e-05	4.64569
CLDN9	0.510969	4.85601	1.75e-06	1.43e-05	4.58183
PENK	-0.685348	-4.84675	1.83e-06	1.48e-05	4.54008
RHCG	-0.844295	-4.84617	1.84e-06	1.48e-05	4.53744
GRPR	0.745148	4.84406	1.86e-06	1.49e-05	4.52794
CYP4F8	0.849025	4.83628	1.92e-06	1.54e-05	4.49293
CHP2	-0.791544	-4.81183	2.16e-06	1.71e-05	4.38319
TUNAR	0.765542	4.81175	2.16e-06	1.71e-05	4.38281
TIMD4	-0.503411	-4.80938	2.19e-06	1.72e-05	4.37222
GJB5	-0.707133	-4.80914	2.19e-06	1.73e-05	4.37113
ALDH3A1	-0.585464	-4.80769	2.2e-06	1.73e-05	4.36465
CYP4B1	-0.572413	-4.79222	2.37e-06	1.85e-05	4.2955
CALML3	-0.741819	-4.77815	2.53e-06	1.96e-05	4.23282
TBX4	-0.8374	-4.77762	2.54e-06	1.96e-05	4.23044
HSPB3	-0.905047	-4.77323	2.59e-06	1.99e-05	4.2109
CRYGD	-0.535312	-4.76156	2.74e-06	2.09e-05	4.15906
ERG	0.521891	4.75941	2.76e-06	2.1e-05	4.14956
C10orf99	-0.64061	-4.74955	2.89e-06	2.19e-05	4.10586
OR7C1	-0.598471	-4.73213	3.14e-06	2.36e-05	4.02883
TAL2	0.505635	4.71395	3.41e-06	2.54e-05	3.94878
IGSF23	0.672629	4.71263	3.44e-06	2.55e-05	3.94294
S100A14	-0.615637	-4.70595	3.54e-06	2.62e-05	3.91361
KRT13	-0.926739	-4.70142	3.62e-06	2.67e-05	3.89371
GRIN3A	0.703213	4.69791	3.68e-06	2.7e-05	3.87834
PI16	-0.673243	-4.69348	3.75e-06	2.75e-05	3.85891
C1QTNF9B	-0.705264	-4.68527	3.9e-06	2.84e-05	3.82299
HHATL	-0.55637	-4.67877	4.02e-06	2.92e-05	3.79454
DOC2A	0.535943	4.65423	4.5e-06	3.22e-05	3.6876
VAX2	0.525097	4.6496	4.6e-06	3.28e-05	3.66748
H2BC17	0.579966	4.64181	4.76e-06	3.39e-05	3.63366
EML6	0.61959	4.62733	5.09e-06	3.59e-05	3.57095
SLC52A1	-0.535055	-4.61264	5.44e-06	3.8e-05	3.50746
DUOXA1	-0.605285	-4.60518	5.63e-06	3.91e-05	3.47531
NAT2	-0.523771	-4.60259	5.7e-06	3.95e-05	3.46417
TMEM190	0.647775	4.60098	5.74e-06	3.97e-05	3.45724
CAPN6	-0.614162	-4.59648	5.86e-06	4.05e-05	3.4379
ISM2	-0.559867	-4.59304	5.95e-06	4.09e-05	3.42308
KCNH8	0.690786	4.57762	6.38e-06	4.34e-05	3.35695
KRT4	-0.788975	-4.57712	6.39e-06	4.34e-05	3.35479
SERPINB5	-0.596744	-4.55202	7.16e-06	4.8e-05	3.24753
GJB3	-0.560646	-4.52957	7.92e-06	5.24e-05	3.15202
SV2B	-0.546695	-4.5273	8e-06	5.29e-05	3.14241
DLX1	0.656598	4.52586	8.06e-06	5.32e-05	3.13628
FAM240C	-0.580409	-4.51787	8.35e-06	5.49e-05	3.10246
KCNJ15	-0.522619	-4.50177	8.97e-06	5.84e-05	3.03439
WNT6	-0.515504	-4.49336	9.32e-06	6.04e-05	2.9989
KRT16	-0.639494	-4.49158	9.39e-06	6.07e-05	2.9914
SERPINA5	-0.516084	-4.48592	9.63e-06	6.21e-05	2.96759
SLC26A3	-0.749764	-4.47986	9.89e-06	6.36e-05	2.9421
CCDC169-SOHLH2	-0.54281	-4.47744	1e-05	6.42e-05	2.93194
NKX3-2	0.522035	4.46258	1.07e-05	6.8e-05	2.8696
OR2B6	0.532179	4.4571	1.09e-05	6.94e-05	2.84667
CCER2	0.515287	4.44877	1.14e-05	7.16e-05	2.81187
KRTAP20-4	0.854403	4.43713	1.2e-05	7.5e-05	2.7633
SEMA3D	-0.520957	-4.41722	1.31e-05	8.11e-05	2.68052
PPFIA2	0.739279	4.40526	1.38e-05	8.48e-05	2.63095
KCNG3	0.694217	4.40298	1.39e-05	8.55e-05	2.62155
TAFA4	-0.53287	-4.39777	1.42e-05	8.73e-05	2.6
UTS2B	0.566776	4.39773	1.42e-05	8.73e-05	2.59984
FAM83B	-0.624043	-4.38466	1.51e-05	9.17e-05	2.54587
INSL5	0.676701	4.38199	1.52e-05	9.25e-05	2.53488
AP001931.1	0.517968	4.36653	1.63e-05	9.83e-05	2.47128
FAT2	-0.541542	-4.34538	1.79e-05	0.000106471	2.38463
ADARB2	0.642191	4.3363	1.86e-05	0.000110276	2.34755
MLC1	-0.566624	-4.33174	1.9e-05	0.000112201	2.32896
CAMP	-0.536581	-4.31817	2.01e-05	0.000118161	2.27369
POTEG	-0.635101	-4.30345	2.14e-05	0.000124924	2.21396
DUOX2	-0.581641	-4.29647	2.21e-05	0.000128236	2.18569
DPEP1	0.554768	4.29256	2.24e-05	0.000130137	2.16988
UNC5D	-0.745376	-4.29176	2.25e-05	0.000130477	2.16666
GSTA1	-0.568899	-4.2793	2.38e-05	0.000137025	2.11634
CHI3L2	-0.58035	-4.27515	2.42e-05	0.000139361	2.0996
MCIDAS	0.573989	4.26684	2.51e-05	0.0001436	2.06617
RNF128	-0.509401	-4.24514	2.75e-05	0.000155479	1.97909
BMP5	-0.918826	-4.23424	2.88e-05	0.000161687	1.93551
INSM1	0.662546	4.22204	3.03e-05	0.000169109	1.88687
OR10H1	-0.637563	-4.20728	3.23e-05	0.000178633	1.82818
SNAP91	0.558768	4.19594	3.39e-05	0.000186026	1.7832
EBF2	0.532391	4.18406	3.56e-05	0.000194095	1.73622
CLCA4	-0.745142	-4.17664	3.67e-05	0.000199639	1.7069
TMEM40	-0.588879	-4.16374	3.88e-05	0.000209633	1.6561
EPHA8	0.50317	4.15909	3.95e-05	0.000213457	1.63784
GGT6	-0.514178	-4.15683	3.99e-05	0.000215133	1.62895
H2BC13	0.520111	4.15201	4.07e-05	0.000219272	1.61003
KRT6A	-0.65045	-4.15009	4.1e-05	0.000220794	1.6025
NOS1	-0.52535	-4.14078	4.27e-05	0.000228287	1.56604
POPDC3	0.578467	4.13964	4.29e-05	0.000229067	1.56156
DACH2	-0.556966	-4.11567	4.74e-05	0.000249812	1.46803
ORM2	-0.6071	-4.10662	4.92e-05	0.000257901	1.43286
DSG3	-0.565048	-4.09856	5.08e-05	0.000265514	1.40158
GPX5	-0.603444	-4.09831	5.09e-05	0.000265719	1.4006
FOXL2NB	0.60219	4.09147	5.24e-05	0.000272751	1.37413
SCGB1A1	-0.677585	-4.07803	5.53e-05	0.000286085	1.32219
KRT23	-0.61253	-4.07588	5.58e-05	0.000288175	1.31389
CST4	-0.674789	-4.07157	5.68e-05	0.000292558	1.29728
GDA	0.674518	4.05666	6.04e-05	0.000309726	1.23994
GCSAML	-0.561762	-4.05312	6.13e-05	0.000313599	1.22634
GLDC	0.660837	4.05153	6.17e-05	0.000315573	1.22022
GRM7	0.598017	4.02936	6.76e-05	0.000342015	1.1354
CYP4F12	-0.501074	-4.02184	6.97e-05	0.000351477	1.10672
RLN2	-0.578361	-4.0062	7.42e-05	0.000371865	1.04724
CSF3	-0.727957	-3.94126	9.65e-05	0.000467726	0.802528
ERN2	-0.670515	-3.94044	9.68e-05	0.000468684	0.799459
AOC1	-0.749733	-3.9343	9.92e-05	0.000478575	0.776499
RFX6	0.576157	3.92313	0.000103712	0.000496115	0.734872
MARCHF11	0.695975	3.87936	0.000123404	0.00057829	0.5727
PADI3	-0.500117	-3.87716	0.000124483	0.000582786	0.564586
SYT4	0.626071	3.85285	0.000136999	0.000633649	0.475293
GABRQ	-0.503335	-3.84637	0.00014053	0.000647531	0.451586
SOX14	-0.787181	-3.84362	0.000142059	0.000654115	0.441505
CADPS	0.60036	3.82455	0.00015307	0.000698076	0.371988
SLITRK3	-0.524764	-3.82334	0.000153794	0.000700235	0.367595
SLC17A4	0.553543	3.77591	0.000184927	0.000822832	0.196087
PRSS21	-0.597542	-3.75798	0.000198173	0.00087441	0.131784
MSLN	-0.529433	-3.75702	0.000198909	0.000876668	0.12834
SLC15A1	-0.564678	-3.74357	0.000209463	0.000917807	0.0803074
KRT15	-0.505865	-3.73242	0.000218614	0.000951511	0.0405918
OLFM4	-0.594342	-3.72621	0.000223878	0.000972257	0.0185006
ANGPTL3	0.558753	3.69195	0.000255088	0.00108942	-0.102608
NKX2-3	0.50679	3.67343	0.000273631	0.00115924	-0.167675
B3GNT3	-0.537554	-3.6488	0.000300247	0.00125891	-0.253692
KCNC2	0.669689	3.6099	0.000347315	0.0014293	-0.388504
SLN	-0.736912	-3.60077	0.000359317	0.00147157	-0.419931
S100A12	-0.507734	-3.59873	0.000362059	0.00148156	-0.426961
STAP1	-0.531468	-3.59158	0.000371801	0.00151466	-0.451516
CGA	0.639717	3.58859	0.000375939	0.00152877	-0.461749
SLC3A1	0.502411	3.5688	0.000404498	0.00162798	-0.529425
TDO2	0.696561	3.55503	0.000425559	0.00169911	-0.576312
KRT75	0.510994	3.55393	0.000427289	0.00170463	-0.58006
ZIC3	0.53144	3.54419	0.000442859	0.00175884	-0.613107
ADAM2	0.706462	3.53859	0.000452056	0.0017921	-0.632083
TP63	-0.511688	-3.51304	0.0004963	0.00194932	-0.718237
HBQ1	0.50829	3.50124	0.00051809	0.00201829	-0.757858
NRAP	-0.627309	-3.4704	0.000579291	0.00221799	-0.860741
ACY3	-0.533377	-3.43551	0.000656675	0.00246206	-0.976141
PLPPR1	0.510539	3.40236	0.000739035	0.00273158	-1.08476
GSTA2	-0.523257	-3.3858	0.000783716	0.00287392	-1.13867
GPR87	-0.519657	-3.36259	0.000850547	0.00308258	-1.21377
WFDC12	-0.648084	-3.34039	0.000919414	0.00329977	-1.28517
CENPVL3	0.501699	3.2985	0.0010637	0.00374747	-1.41867
SLC39A2	-0.603534	-3.29317	0.00108347	0.00380889	-1.43552
MUC4	-0.52082	-3.28074	0.001131	0.00395182	-1.47479
SST	0.572045	3.19358	0.00152233	0.00510592	-1.74603
H2BC9	0.5213	3.19161	0.00153246	0.0051371	-1.75207
PLA2G4D	-0.526	-3.14179	0.00181077	0.00594275	-1.90395
LY6K	-0.58236	-3.1199	0.00194719	0.006332	-1.96995
ACTN2	-0.552408	-3.10945	0.00201557	0.00652078	-2.00129
CRISP3	0.564921	3.10793	0.00202572	0.00654926	-2.00585
CXCL5	-0.508741	-3.02212	0.00268006	0.00831963	-2.25942
PON1	-0.582702	-3.00788	0.00280573	0.00866983	-2.30083
SEMG2	0.609132	3.00664	0.00281694	0.00869761	-2.30444
SLCO1B3	0.56014	2.98918	0.0029791	0.00911198	-2.35497
TDRD1	0.518294	2.98022	0.00306553	0.00934387	-2.38078
ORM1	-0.640728	-2.73731	0.00648521	0.0177017	-3.05238
MYL1	-0.570636	-2.52263	0.0120552	0.0299657	-3.60024
MYH7	-0.553993	-2.52081	0.0121169	0.0301038	-3.60472
MUC6	-0.515939	-2.35015	0.0192761	0.0445148	-4.00906

## Sheet: Table S6
Table S6. GO enrichment of significant differentially expressed genes between the high- and low-risk subgroups in the TCGA cohort.
	ONTOLOGY	ID	Description	GeneRatio	BgRatio	Pvalue	P.adjust	qvalue	geneID	Count
GO:0000070	BP	GO:0000070	mitotic sister chromatid segregation	19/543	168/18722	4.43224e-07	0.00108277	0.000987466	NUF2/CENPE/KIF4A/KIF18B/NCAPG/KIF14/CENPF/BUB1B/ESPL1/NEK2/PLK1/UBE2C/KIF18A/CENPK/DLGAP5/SGO1/BUB1/HASPIN/KIF25	19
GO:0000280	BP	GO:0000280	nuclear division	33/543	439/18722	6.52572e-07	0.00108277	0.000987466	EME1/SPDYA/NUF2/CENPE/CCNE2/KIF4A/KIF18B/MSH5/NCAPG/KIF14/CENPF/BUB1B/MKI67/ESPL1/NEK2/ASPM/PLK1/UBE2C/KIF18A/TOP2A/CENPK/RAD54L/DLGAP5/KIF15/EDN3/CDC25C/SGO1/BUB1/HASPIN/C14orf39/MISP/IGF1/KIF25	33
GO:0140014	BP	GO:0140014	mitotic nuclear division	25/543	287/18722	1.09735e-06	0.00108277	0.000987466	NUF2/CENPE/KIF4A/KIF18B/NCAPG/KIF14/CENPF/BUB1B/MKI67/ESPL1/NEK2/PLK1/UBE2C/KIF18A/CENPK/DLGAP5/KIF15/EDN3/CDC25C/SGO1/BUB1/HASPIN/MISP/IGF1/KIF25	25
GO:0007059	BP	GO:0007059	chromosome segregation	28/543	346/18722	1.10234e-06	0.00108277	0.000987466	EME1/NUF2/CENPE/CCNE2/KIF4A/KIF18B/NCAPG/KIF14/CENPF/BUB1B/OIP5/MKI67/ESPL1/NEK2/SKA3/PLK1/UBE2C/KIF18A/TOP2A/CENPK/DLGAP5/KNL1/SGO1/BUB1/HASPIN/C14orf39/HJURP/KIF25	28
GO:0034508	BP	GO:0034508	centromere complex assembly	8/543	30/18722	1.58461e-06	0.00121591	0.00110888	CENPE/CENPF/OIP5/CENPK/CENPI/DLGAP5/CENPA/HJURP	8
GO:0000819	BP	GO:0000819	sister chromatid segregation	20/543	202/18722	1.85682e-06	0.00121591	0.00110888	NUF2/CENPE/KIF4A/KIF18B/NCAPG/KIF14/CENPF/BUB1B/ESPL1/NEK2/PLK1/UBE2C/KIF18A/TOP2A/CENPK/DLGAP5/SGO1/BUB1/HASPIN/KIF25	20
GO:0048285	BP	GO:0048285	organelle fission	34/543	488/18722	2.44433e-06	0.00124739	0.00113759	EME1/SPDYA/NUF2/CENPE/CCNE2/KIF4A/KIF18B/MSH5/NCAPG/KIF14/CENPF/BUB1B/MKI67/ESPL1/NEK2/ASPM/PPARGC1A/PLK1/UBE2C/KIF18A/TOP2A/CENPK/RAD54L/DLGAP5/KIF15/EDN3/CDC25C/SGO1/BUB1/HASPIN/C14orf39/MISP/IGF1/KIF25	34
GO:0098813	BP	GO:0098813	nuclear chromosome segregation	24/543	281/18722	2.53986e-06	0.00124739	0.00113759	EME1/NUF2/CENPE/CCNE2/KIF4A/KIF18B/NCAPG/KIF14/CENPF/BUB1B/ESPL1/NEK2/PLK1/UBE2C/KIF18A/TOP2A/CENPK/DLGAP5/KNL1/SGO1/BUB1/HASPIN/C14orf39/KIF25	24
GO:0002026	BP	GO:0002026	regulation of the force of heart contraction	7/543	26/18722	6.763e-06	0.00295242	0.00269254	APLN/ATP1A2/ADRA1A/MYH6/RYR2/NOS1/MYH7	7
GO:0048736	BP	GO:0048736	appendage development	17/543	172/18722	1.11595e-05	0.00398595	0.0036351	FOXN1/AFF3/FGFR2/EVX2/SALL4/RSPO2/TBX5/SMOC1/COMP/HOXD13/ALX4/GDF5/HOXD12/FREM2/FGF10/TBX4/TP63	17
GO:0060173	BP	GO:0060173	limb development	17/543	172/18722	1.11595e-05	0.00398595	0.0036351	FOXN1/AFF3/FGFR2/EVX2/SALL4/RSPO2/TBX5/SMOC1/COMP/HOXD13/ALX4/GDF5/HOXD12/FREM2/FGF10/TBX4/TP63	17
GO:0031016	BP	GO:0031016	pancreas development	11/543	77/18722	1.30521e-05	0.00427347	0.00389731	ONECUT2/MNX1/NKX6-1/NKX2-2/FGF10/NKX3-2/BMP5/INSM1/RFX6/MSLN/ZIC3	11
GO:0009410	BP	GO:0009410	response to xenobiotic stimulus	31/543	462/18722	1.4355e-05	0.00433853	0.00395664	CYP4F2/DNMT3B/CENPF/PPARGC1A/RAD54L/CD38/NAT1/ACTC1/AMH/CYP3A5/NKX6-1/ADRA1A/CA9/PON3/ADCYAP1R1/NPPC/LCN2/INHBA/DRD1/UGT2B15/CERS1/ALDH3A1/NAT2/DPEP1/GSTA1/NOS1/SCGB1A1/CYP4F12/S100A12/GSTA2/SST	31
GO:0097154	BP	GO:0097154	GABAergic neuron differentiation	5/543	13/18722	2.13792e-05	0.00599991	0.00547178	DLX2/INHBA/DRD1/NKX2-1/DLX1	5
GO:0021988	BP	GO:0021988	olfactory lobe development	7/543	31/18722	2.38378e-05	0.00624391	0.0056943	KIF14/ATP1A2/SEMA3A/LHX2/FEZF1/DLX2/EFNA2	7
GO:0051383	BP	GO:0051383	kinetochore organization	6/543	23/18722	3.8369e-05	0.00942198	0.00859263	NUF2/CENPE/CENPF/CENPK/DLGAP5/CENPA	6
GO:0035107	BP	GO:0035107	appendage morphogenesis	14/543	138/18722	4.92395e-05	0.0107479	0.00980184	AFF3/FGFR2/EVX2/SALL4/RSPO2/TBX5/HOXD13/ALX4/GDF5/HOXD12/FREM2/FGF10/TBX4/TP63	14
GO:0035108	BP	GO:0035108	limb morphogenesis	14/543	138/18722	4.92395e-05	0.0107479	0.00980184	AFF3/FGFR2/EVX2/SALL4/RSPO2/TBX5/HOXD13/ALX4/GDF5/HOXD12/FREM2/FGF10/TBX4/TP63	14
GO:0051321	BP	GO:0051321	meiotic cell cycle	20/543	261/18722	8.04656e-05	0.0166394	0.0151748	EME1/SPDYA/NUF2/CCNE2/MSH5/BUB1B/ESPL1/NEK2/ASPM/PLK1/KIF18A/TOP2A/RAD54L/CDC25C/SGO1/BUB1/C14orf39/EXO1/NPPC/TDRD1	20
GO:0006805	BP	GO:0006805	xenobiotic metabolic process	12/543	111/18722	9.11341e-05	0.0179033	0.0163274	CYP4F2/NAT1/CYP3A5/PON3/UGT2B15/ALDH3A1/NAT2/GSTA1/NOS1/CYP4F12/S100A12/GSTA2	12
GO:0007409	BP	GO:0007409	axonogenesis	27/543	418/18722	9.67738e-05	0.0181059	0.0165122	CCK/LHX4/TUBB3/RND2/LGR6/SEMA4G/FGFR2/NKX6-1/NCAM1/TRIM46/MCF2/SEMA3A/LHX2/FOXD1/FEZF1/PAK3/BRSK2/SLITRK6/ATP8A2/SLITRK4/NKX2-1/EFNA2/VAX2/SEMA3D/UNC5D/EPHA8/SLITRK3	27
GO:0061564	BP	GO:0061564	axon development	29/543	467/18722	0.000107569	0.0192108	0.0175198	CCK/LHX4/TUBB3/RND2/LGR6/SEMA4G/FGFR2/NKX6-1/NCAM1/TRIM46/MCF2/SEMA3A/LHX2/FOXD1/FEZF1/FOLR1/PAK3/BRSK2/SLITRK6/ATP8A2/SLITRK4/NKX2-1/EFNA2/VAX2/SEMA3D/UNC5D/EPHA8/GRM7/SLITRK3	29
GO:0051382	BP	GO:0051382	kinetochore assembly	5/543	18/18722	0.000126184	0.0215555	0.0196581	CENPE/CENPF/CENPK/DLGAP5/CENPA	5
GO:0021772	BP	GO:0021772	olfactory bulb development	6/543	29/18722	0.000155725	0.0254935	0.0232494	KIF14/SEMA3A/LHX2/FEZF1/DLX2/EFNA2	6
GO:0002067	BP	GO:0002067	glandular epithelial cell differentiation	8/543	55/18722	0.000174381	0.0263516	0.0240321	FGFR2/NKX6-1/NKX2-2/IL31RA/BMP5/INSM1/RFX6/TP63	8
GO:0003229	BP	GO:0003229	ventricular cardiac muscle tissue development	8/543	55/18722	0.000174381	0.0263516	0.0240321	FOXH1/FGFR2/TBX5/MYH6/NRG1/COL11A1/RYR2/MYH7	8
GO:0021892	BP	GO:0021892	cerebral cortex GABAergic interneuron differentiation	4/543	11/18722	0.00019633	0.0277689	0.0253246	DLX2/DRD1/NKX2-1/DLX1	4
GO:0002027	BP	GO:0002027	regulation of heart rate	11/543	103/18722	0.000197895	0.0277689	0.0253246	CACNA1D/APLN/ADRA1D/EDN3/SCN2B/ADRA1A/SEMA3A/MYH6/KCNH6/RYR2/MYH7	11
GO:0006813	BP	GO:0006813	potassium ion transport	18/543	241/18722	0.000247662	0.0329762	0.0300735	CACNA1D/ATP1A2/SLC9A5/EDN3/KCNB1/KCNF1/SLC9A3/SLC24A2/NETO1/DRD1/KCNH6/KCNJ6/KCNH8/KCNJ15/KCNG3/NOS1/KCNC2/ACTN2	18
GO:0034765	BP	GO:0034765	regulation of ion transmembrane transport	29/543	491/18722	0.000251791	0.0329762	0.0300735	CACNA1D/CACNG4/PPARGC1A/CACNG1/SHISA9/LIME1/ATP1A2/STAC/EDN3/JPH4/SCN2B/ASIC2/KCNB1/KCNF1/HECW1/LCN2/CASQ1/NETO1/DRD1/KCNH6/KCNJ6/RYR2/KCNH8/KCNJ15/KCNG3/NOS1/KCNC2/SLN/ACTN2	29
GO:1903046	BP	GO:1903046	meiotic cell cycle process	16/543	202/18722	0.000280232	0.0355171	0.0323908	EME1/SPDYA/NUF2/CCNE2/MSH5/BUB1B/ESPL1/ASPM/PLK1/KIF18A/TOP2A/RAD54L/CDC25C/SGO1/BUB1/C14orf39	16
GO:0030071	BP	GO:0030071	regulation of mitotic metaphase/anaphase transition	8/543	60/18722	0.000322843	0.0362154	0.0330276	CENPE/CENPF/BUB1B/ESPL1/PLK1/UBE2C/DLGAP5/BUB1	8
GO:0055008	BP	GO:0055008	cardiac muscle tissue morphogenesis	8/543	60/18722	0.000322843	0.0362154	0.0330276	FOXH1/FGFR2/ACTC1/MYH6/NRG1/COL11A1/RYR2/MYH7	8
GO:0031018	BP	GO:0031018	endocrine pancreas development	7/543	46/18722	0.000333144	0.0362154	0.0330276	ONECUT2/MNX1/NKX6-1/NKX2-2/BMP5/INSM1/RFX6	7
GO:0055010	BP	GO:0055010	ventricular cardiac muscle tissue morphogenesis	7/543	46/18722	0.000333144	0.0362154	0.0330276	FOXH1/FGFR2/MYH6/NRG1/COL11A1/RYR2/MYH7	7
GO:0140013	BP	GO:0140013	meiotic nuclear division	15/543	185/18722	0.000335445	0.0362154	0.0330276	EME1/SPDYA/NUF2/CCNE2/MSH5/BUB1B/ESPL1/ASPM/PLK1/KIF18A/TOP2A/RAD54L/SGO1/BUB1/C14orf39	15
GO:0007088	BP	GO:0007088	regulation of mitotic nuclear division	11/543	110/18722	0.000352716	0.0362154	0.0330276	CENPF/BUB1B/MKI67/ESPL1/NEK2/PLK1/DLGAP5/EDN3/CDC25C/BUB1/IGF1	11
GO:0045132	BP	GO:0045132	meiotic chromosome segregation	10/543	93/18722	0.000362056	0.0362154	0.0330276	EME1/NUF2/CCNE2/BUB1B/ESPL1/PLK1/TOP2A/SGO1/BUB1/C14orf39	10
GO:0006836	BP	GO:0006836	neurotransmitter transport	16/543	208/18722	0.00038883	0.0362154	0.0330276	ATP1A2/TACR2/ADRA1A/SLC18A3/PRKCB/SYT1/DRD1/CHAT/GRIN3A/DOC2A/SV2B/PPFIA2/NOS1/SYT4/GABRQ/CADPS	16
GO:0035137	BP	GO:0035137	hindlimb morphogenesis	6/543	34/18722	0.000389911	0.0362154	0.0330276	AFF3/RSPO2/ALX4/GDF5/TBX4/TP63	6
GO:0003015	BP	GO:0003015	heart process	18/543	251/18722	0.000405208	0.0362154	0.0330276	CACNA1D/APLN/ATP1A2/ADRA1D/EDN3/ACTC1/SCN2B/ADRA1A/NOX4/TBX5/SEMA3A/SGCG/MYH6/KCNH6/RYR2/NOS1/MYL1/MYH7	18
GO:0042476	BP	GO:0042476	odontogenesis	12/543	130/18722	0.000405437	0.0362154	0.0330276	CA2/FGFR2/AQP5/RSPO2/DLX2/INHBA/AMTN/FGF10/DLX1/WNT6/NKX2-3/TP63	12
GO:0007091	BP	GO:0007091	metaphase/anaphase transition of mitotic cell cycle	8/543	62/18722	0.000405568	0.0362154	0.0330276	CENPE/CENPF/BUB1B/ESPL1/PLK1/UBE2C/DLGAP5/BUB1	8
GO:0048663	BP	GO:0048663	neuron fate commitment	8/543	62/18722	0.000405568	0.0362154	0.0330276	MNX1/NKX2-2/NTRK3/DLX2/NRG1/NKX2-1/OLIG1/DLX1	8
GO:0045666	BP	GO:0045666	positive regulation of neuron differentiation	10/543	95/18722	0.000430082	0.037551	0.0342456	DNMT3B/RNF112/NKX6-1/NKX2-2/FEZF1/BRINP3/DLX2/GDF5/DUOXA1/DLX1	10
GO:1902099	BP	GO:1902099	regulation of metaphase/anaphase transition of cell cycle	8/543	63/18722	0.000452958	0.0386885	0.035283	CENPE/CENPF/BUB1B/ESPL1/PLK1/UBE2C/DLGAP5/BUB1	8
GO:0051304	BP	GO:0051304	chromosome separation	10/543	96/18722	0.000467886	0.0391133	0.0356704	EME1/CENPE/CENPF/BUB1B/ESPL1/PLK1/UBE2C/TOP2A/DLGAP5/BUB1	10
GO:0120254	BP	GO:0120254	olefinic compound metabolic process	13/543	153/18722	0.000527166	0.040834	0.0372397	CYP4F2/PPARGC1A/SRD5A2/CYP11A1/RPE65/ALOX15B/ALOX15/PLA2G4B/CYP3A5/RDH16/GSTA1/BMP5/CYP4F12	13
GO:0060571	BP	GO:0060571	morphogenesis of an epithelial fold	5/543	24/18722	0.000542068	0.040834	0.0372397	FGFR2/HOXD13/FGF10/BMP5/TP63	5
GO:0048738	BP	GO:0048738	cardiac muscle tissue development	17/543	236/18722	0.000552605	0.040834	0.0372397	FOXH1/FGFR2/ACTC1/MYOCD/ADRA1A/TBX5/SGCG/MYH6/NRG1/COL11A1/IGF1/RYR2/PI16/BMP5/NRAP/ACTN2/MYH7	17
GO:0030326	BP	GO:0030326	embryonic limb morphogenesis	11/543	116/18722	0.000556638	0.040834	0.0372397	AFF3/SALL4/RSPO2/TBX5/HOXD13/ALX4/GDF5/HOXD12/FREM2/TBX4/TP63	11
GO:0035113	BP	GO:0035113	embryonic appendage morphogenesis	11/543	116/18722	0.000556638	0.040834	0.0372397	AFF3/SALL4/RSPO2/TBX5/HOXD13/ALX4/GDF5/HOXD12/FREM2/TBX4/TP63	11
GO:0010965	BP	GO:0010965	regulation of mitotic sister chromatid separation	8/543	65/18722	0.00056122	0.040834	0.0372397	CENPE/CENPF/BUB1B/ESPL1/PLK1/UBE2C/DLGAP5/BUB1	8
GO:0044784	BP	GO:0044784	metaphase/anaphase transition of cell cycle	8/543	65/18722	0.00056122	0.040834	0.0372397	CENPE/CENPF/BUB1B/ESPL1/PLK1/UBE2C/DLGAP5/BUB1	8
GO:0021872	BP	GO:0021872	forebrain generation of neurons	7/543	51/18722	0.000636062	0.0454379	0.0414383	ASPM/FGFR2/SEMA3A/DLX2/INHBA/NKX2-1/DLX1	7
GO:0051588	BP	GO:0051588	regulation of neurotransmitter transport	10/543	100/18722	0.000647789	0.0454493	0.0414487	ATP1A2/TACR2/ADRA1A/PRKCB/SYT1/DRD1/GRIN3A/PPFIA2/NOS1/SYT4	10
GO:0071466	BP	GO:0071466	cellular response to xenobiotic stimulus	14/543	177/18722	0.000670702	0.0458379	0.0418031	CYP4F2/NAT1/CYP3A5/PON3/UGT2B15/CERS1/ALDH3A1/NAT2/DPEP1/GSTA1/NOS1/CYP4F12/S100A12/GSTA2	14
GO:0071805	BP	GO:0071805	potassium ion transmembrane transport	16/543	219/18722	0.000683501	0.0458379	0.0418031	CACNA1D/ATP1A2/SLC9A5/EDN3/KCNB1/KCNF1/SLC9A3/SLC24A2/NETO1/KCNH6/KCNJ6/KCNH8/KCNJ15/KCNG3/KCNC2/ACTN2	16
GO:0051306	BP	GO:0051306	mitotic sister chromatid separation	8/543	67/18722	0.000689499	0.0458379	0.0418031	CENPE/CENPF/BUB1B/ESPL1/PLK1/UBE2C/DLGAP5/BUB1	8
GO:0060047	BP	GO:0060047	heart contraction	17/543	241/18722	0.000699993	0.0458379	0.0418031	CACNA1D/APLN/ATP1A2/ADRA1D/EDN3/ACTC1/SCN2B/ADRA1A/TBX5/SEMA3A/SGCG/MYH6/KCNH6/RYR2/NOS1/MYL1/MYH7	17
GO:0010273	BP	GO:0010273	detoxification of copper ion	4/543	15/18722	0.000740374	0.0460015	0.0419523	MT1M/MT1B/MT1H/MT1A	4
GO:0033275	BP	GO:0033275	actin-myosin filament sliding	4/543	15/18722	0.000740374	0.0460015	0.0419523	ACTC1/MYH6/MYL1/MYH7	4
GO:1990169	BP	GO:1990169	stress response to copper ion	4/543	15/18722	0.000740374	0.0460015	0.0419523	MT1M/MT1B/MT1H/MT1A	4
GO:0006941	BP	GO:0006941	striated muscle contraction	14/543	179/18722	0.000749324	0.0460015	0.0419523	CACNA1D/ATP1A2/CCDC78/STAC/ACTC1/SCN2B/ADRA1A/MYH6/CASQ1/ATP8A2/RYR2/NOS1/MYL1/MYH7	14
GO:0045823	BP	GO:0045823	positive regulation of heart contraction	6/543	39/18722	0.000836797	0.0493475	0.0450038	APLN/ATP1A2/ADRA1D/EDN3/ADRA1A/RYR2	6
GO:0035296	BP	GO:0035296	regulation of tube diameter	12/543	141/18722	0.000841507	0.0493475	0.0450038	APLN/ATP1A2/ADRA1D/CD38/EDN3/ASIC2/ADRA1A/P2RY2/COMP/DRD1/UTS2B/NOS1	12
GO:0097746	BP	GO:0097746	blood vessel diameter maintenance	12/543	141/18722	0.000841507	0.0493475	0.0450038	APLN/ATP1A2/ADRA1D/CD38/EDN3/ASIC2/ADRA1A/P2RY2/COMP/DRD1/UTS2B/NOS1	12
GO:0000779	CC	GO:0000779	condensed chromosome, centromeric region	16/581	144/19549	6.17117e-06	0.00212518	0.00191354	NUF2/CENPE/NCAPG/CENPF/BUB1B/NEK2/SKA3/PLK1/KIF18A/CENPK/CENPI/CENPA/KNL1/SGO1/BUB1/HJURP	16
GO:0000776	CC	GO:0000776	kinetochore	15/581	134/19549	1.09385e-05	0.00212518	0.00191354	NUF2/CENPE/CENPF/BUB1B/NEK2/SKA3/PLK1/KIF18A/CENPK/CENPI/CENPA/KNL1/SGO1/BUB1/HJURP	15
GO:0042383	CC	GO:0042383	sarcolemma	15/581	138/19549	1.56263e-05	0.00212518	0.00191354	CACNA1D/CACNG4/CACNG1/ATP1A2/CCDC78/SLC2A4/STAC/KCNB1/ADRA1A/SLC2A5/SGCG/CASQ1/RYR2/NOS1/POPDC3	15
GO:0000775	CC	GO:0000775	chromosome, centromeric region	18/581	198/19549	2.72096e-05	0.00277538	0.00249899	NUF2/CENPE/NCAPG/CENPF/BUB1B/OIP5/NEK2/SKA3/PLK1/KIF18A/TOP2A/CENPK/CENPI/CENPA/KNL1/SGO1/BUB1/HJURP	18
GO:0030315	CC	GO:0030315	T-tubule	8/581	51/19549	0.000119685	0.00915091	0.0082396	CACNA1D/CACNG4/CACNG1/ATP1A2/SLC2A4/STAC/ADRA1A/CASQ1	8
GO:0000793	CC	GO:0000793	condensed chromosome	19/581	244/19549	0.000134572	0.00915091	0.0082396	NUF2/CENPE/NCAPG/CENPF/BUB1B/MKI67/NEK2/SKA3/PLK1/KIF18A/TOP2A/CENPK/CENPI/CENPA/KNL1/SGO1/BUB1/C14orf39/HJURP	19
GO:0016529	CC	GO:0016529	sarcoplasmic reticulum	9/581	70/19549	0.000220014	0.0128237	0.0115466	P3H2/CCDC78/SLC2A4/JPH4/CLEC18B/CASQ1/RYR2/NOS1/SLN	9
GO:0016324	CC	GO:0016324	apical plasma membrane	24/581	367/19549	0.000279928	0.0142763	0.0128546	CYP4F2/ASPM/SLC5A8/AQP5/SLC16A8/SLC2A5/NOX4/PROM1/MAL/SLC9A3/FOLR1/CD300LG/F2RL2/RHCG/SLC26A3/DUOX2/DPEP1/CLCA4/CYP4F12/SLC17A4/SLC15A1/KCNC2/SLC3A1/ACY3	24
GO:0000940	CC	GO:0000940	outer kinetochore	4/581	12/19549	0.000316008	0.0143257	0.0128991	CENPF/BUB1B/SKA3/PLK1	4
GO:0062023	CC	GO:0062023	collagen-containing extracellular matrix	26/581	425/19549	0.000444009	0.0177101	0.0159464	GPC2/COL4A6/P3H2/IMPG1/FGFR2/COL10A1/COL11A2/DPT/GDF10/CTHRC1/VIT/NDP/NCAM1/ANGPTL1/ANGPT1/COL23A1/SMOC1/COL11A1/COMP/AMTN/FREM2/FGF10/SERPINA5/ORM2/ANGPTL3/ORM1	26
GO:0035580	CC	GO:0035580	specific granule lumen	8/581	62/19549	0.000477479	0.0177101	0.0159464	LRRC7/LCN2/CAMP/ORM2/AOC1/OLFM4/CRISP3/ORM1	8
GO:0016528	CC	GO:0016528	sarcoplasm	9/581	79/19549	0.000549879	0.0186959	0.016834	P3H2/CCDC78/SLC2A4/JPH4/CLEC18B/CASQ1/RYR2/NOS1/SLN	9
GO:0045177	CC	GO:0045177	apical part of cell	26/581	435/19549	0.000628213	0.0197162	0.0177527	CA2/CYP4F2/ASPM/SLC5A8/AQP5/SLC16A8/SLC2A5/NOX4/FAP/PROM1/MAL/SLC9A3/FOLR1/CD300LG/F2RL2/RHCG/SLC26A3/DUOX2/DPEP1/CLCA4/CYP4F12/SLC17A4/SLC15A1/KCNC2/SLC3A1/ACY3	26
GO:0031674	CC	GO:0031674	I band	12/581	141/19549	0.00104082	0.0302374	0.0272262	CACNA1D/LDB3/FBP2/ACTC1/KY/ADRA1A/MYH6/CASQ1/RYR2/NRAP/ACTN2/MYH7	12
GO:0005581	CC	GO:0005581	collagen trimer	9/581	87/19549	0.00111167	0.0302374	0.0272262	COL4A6/CCBE1/COL10A1/COL11A2/CTHRC1/COL23A1/COL11A1/C1QL1/C1QTNF9B	9
GO:0005876	CC	GO:0005876	spindle microtubule	8/581	72/19549	0.00130479	0.0332721	0.0299586	CENPE/KIF4A/KIF18B/SKA3/PLK1/KIF18A/MISP/CAPN6	8
GO:0030018	CC	GO:0030018	Z disc	11/581	130/19549	0.00174072	0.0395866	0.0356443	CACNA1D/LDB3/FBP2/KY/ADRA1A/MYH6/CASQ1/RYR2/NRAP/ACTN2/MYH7	11
GO:0031225	CC	GO:0031225	anchored component of membrane	13/581	170/19549	0.00174647	0.0395866	0.0356443	GPC2/LY6G6D/LSAMP/ULBP1/NCAM1/ULBP2/LY6D/FOLR1/EFNA2/DPEP1/PRSS21/MSLN/LY6K	13
GO:0048018	MF	GO:0048018	receptor ligand activity	36/562	487/18367	1.06775e-06	0.000526079	0.000483931	CCK/APLN/TAFA1/EDN3/SEMA4G/NRG2/TSLP/AMH/GDF10/CMTM5/NDP/FGF7/SCGB3A1/SEMA3A/PROK1/NPPC/NRG1/INHBA/GDF5/RLN1/IGF1/FGF10/PENK/C10orf99/WNT6/SEMA3D/TAFA4/UTS2B/INSL5/BMP5/RLN2/CSF3/ANGPTL3/CGA/SST/CXCL5	36
GO:0030546	MF	GO:0030546	signaling receptor activator activity	36/562	495/18367	1.56107e-06	0.000526079	0.000483931	CCK/APLN/TAFA1/EDN3/SEMA4G/NRG2/TSLP/AMH/GDF10/CMTM5/NDP/FGF7/SCGB3A1/SEMA3A/PROK1/NPPC/NRG1/INHBA/GDF5/RLN1/IGF1/FGF10/PENK/C10orf99/WNT6/SEMA3D/TAFA4/UTS2B/INSL5/BMP5/RLN2/CSF3/ANGPTL3/CGA/SST/CXCL5	36
GO:0005179	MF	GO:0005179	hormone activity	14/562	122/18367	2.20877e-05	0.00496237	0.00456479	CCK/APLN/EDN3/AMH/NPPC/INHBA/RLN1/IGF1/PENK/UTS2B/INSL5/RLN2/CGA/SST	14
GO:0016702	MF	GO:0016702	oxidoreductase activity, acting on single donors with incorporation of molecular oxygen, incorporation of two atoms of oxygen	6/562	23/18367	5.17211e-05	0.008715	0.00801677	RPE65/ALOX15B/ALOX15/HPD/HPDL/TDO2	6
GO:0016701	MF	GO:0016701	oxidoreductase activity, acting on single donors with incorporation of molecular oxygen	6/562	24/18367	6.71877e-05	0.0090569	0.00833127	RPE65/ALOX15B/ALOX15/HPD/HPDL/TDO2	6
GO:0022803	MF	GO:0022803	passive transmembrane transporter activity	30/562	481/18367	0.000193568	0.0186578	0.017163	CACNA1D/CACNG4/CACNG1/SLC5A8/ANO4/SCNN1D/AQP5/GJC3/SCN2B/ASIC2/KCNB1/GRIA3/KCNF1/P2RX5/ANO5/CLCA2/SLC24A2/KCNH6/KCNJ6/GJB4/RYR2/GJB5/GRIN3A/KCNH8/GJB3/KCNJ15/KCNG3/CLCA4/GABRQ/KCNC2	30
GO:0003774	MF	GO:0003774	cytoskeletal motor activity	12/562	114/18367	0.000193775	0.0186578	0.017163	CENPE/KIF4A/KIF18B/KIF14/KIF18A/KIF15/KIF20A/ACTC1/DNAH8/MYH6/KIF25/MYH7	12
GO:0003777	MF	GO:0003777	microtubule motor activity	9/562	69/18367	0.000243705	0.0205321	0.0188871	CENPE/KIF4A/KIF18B/KIF14/KIF18A/KIF15/KIF20A/DNAH8/KIF25	9
GO:0022836	MF	GO:0022836	gated channel activity	23/562	340/18367	0.000344134	0.0257718	0.023707	CACNA1D/CACNG4/CACNG1/ANO4/SCNN1D/SCN2B/ASIC2/KCNB1/GRIA3/KCNF1/P2RX5/ANO5/CLCA2/KCNH6/KCNJ6/RYR2/GRIN3A/KCNH8/KCNJ15/KCNG3/CLCA4/GABRQ/KCNC2	23
GO:0015267	MF	GO:0015267	channel activity	29/562	480/18367	0.000415737	0.0280207	0.0257757	CACNA1D/CACNG4/CACNG1/ANO4/SCNN1D/AQP5/GJC3/SCN2B/ASIC2/KCNB1/GRIA3/KCNF1/P2RX5/ANO5/CLCA2/SLC24A2/KCNH6/KCNJ6/GJB4/RYR2/GJB5/GRIN3A/KCNH8/GJB3/KCNJ15/KCNG3/CLCA4/GABRQ/KCNC2	29
GO:0140103	MF	GO:0140103	catalytic activity, acting on a glycoprotein	5/562	23/18367	0.000561091	0.0343796	0.0316251	B4GALNT4/MGAT5B/B3GNT6/ABO/B3GNT3	5
GO:0070330	MF	GO:0070330	aromatase activity	5/562	25/18367	0.000842299	0.0473091	0.0435188	CYP4F2/CYP3A5/CYP4F8/CYP4B1/CYP4F12	5

## Sheet: Table S7
Table S7. KEGG enrichment of significant differentially expressed genes between the high- and low-risk subgroups in the TCGA cohort.
ID	Description	GeneRatio	BgRatio	Pvalue	P.adjust	qvalue	geneID	Count
hsa04970	Salivary secretion	12/237	93/8144	1.44292e-05	0.00372273	0.00325036	477/146/952/362/148/5579/1470/1755/810/820/4842/1472	12
hsa04080	Neuroactive ligand-receptor interaction	25/237	362/8144	4.86464e-05	0.00512287	0.00447284	885/8862/146/6865/1908/2892/148/5029/5026/6751/117/2862/1812/2151/6013/5179/2925/116443/257313/10022/2917/6019/55879/1081/6750	25
hsa00590	Arachidonic acid metabolism	9/237	61/8144	5.95683e-05	0.00512287	0.00447284	8529/391013/247/246/100137049/2877/11283/2880/283748	9
hsa04020	Calcium signaling pathway	18/237	240/8144	0.000210758	0.0135939	0.011869	776/146/952/6865/2263/148/2252/5579/5026/4916/844/1812/5137/2255/6262/2925/810/4842	18
hsa05410	Hypertrophic cardiomyopathy	10/237	90/8144	0.000267408	0.0137983	0.0120475	776/8515/27092/786/70/6445/4624/3479/6262/4625	10
hsa05414	Dilated cardiomyopathy	10/237	96/8144	0.000452784	0.0194697	0.0169993	776/8515/27092/786/70/6445/4624/3479/6262/4625	10
hsa04972	Pancreatic secretion	10/237	102/8144	0.000734374	0.0270669	0.0236325	760/885/477/952/391013/5579/9635/6262/1811/22802	10
hsa00480	Glutathione metabolism	7/237	58/8144	0.00137296	0.0396931	0.0346565	290/2949/2877/2938/124975/2880/2939	7
hsa04261	Adrenergic signaling in cardiomyocytes	12/237	150/8144	0.00138464	0.0396931	0.0346565	776/27092/786/477/146/70/5502/148/4624/6262/810/4625	12
hsa04978	Mineral absorption	7/237	60/8144	0.0016789	0.0433156	0.0378194	477/4499/4490/6550/4496/4489/1811	7
