# Supplementary material for: Construction and validation of a fatty acid metabolism-related gene signature for predicting prognosis and therapeutic response in patients with prostate cancer
Source: PeerJ. 2023 Feb 6;11:e14854. doi: 10.7717/peerj.14854 (PMC9910187; doi:10.7717/peerj.14854)
Supplement: Supplemental Information 2 [file peerj-11-14854-s002.xlsx]

## Sheet: qRT-PCR raw Data
Test	ID	Target	Sample	Cq
Repeat 1	1	GAPDH	RWPE1	14.63
Repeat 1	2	GAPDH	RWPE1	14.61
Repeat 1	3	GAPDH	RWPE1	14.67
Repeat 1	1	GAPDH	PC3	14.8
Repeat 1	2	GAPDH	PC3	14.7
Repeat 1	3	GAPDH	PC3	14.83
Repeat 1	1	GAPDH	LNCAP	15.04
Repeat 1	2	GAPDH	LNCAP	15.1
Repeat 1	3	GAPDH	LNCAP	15.12
Repeat 1	1	ALDH1A1	RWPE1	24.27
Repeat 1	2	ALDH1A1	RWPE1	24.2
Repeat 1	3	ALDH1A1	RWPE1	24.24
Repeat 1	1	ALDH1A1	PC3	29.89
Repeat 1	2	ALDH1A1	PC3	30.34
Repeat 1	3	ALDH1A1	PC3	30.28
Repeat 1	1	ALDH1A1	LNCAP	30.85
Repeat 1	2	ALDH1A1	LNCAP	31.4
Repeat 1	3	ALDH1A1	LNCAP	31.06
Repeat 1	1	CA2	RWPE1	20.26
Repeat 1	2	CA2	RWPE1	20.26
Repeat 1	3	CA2	RWPE1	20.26
Repeat 1	1	CA2	PC3	28.23
Repeat 1	2	CA2	PC3	28.17
Repeat 1	3	CA2	PC3	28.22
Repeat 1	1	CA2	LNCAP	32.5
Repeat 1	2	CA2	LNCAP	33.14
Repeat 1	3	CA2	LNCAP	33.29
Repeat 1	1	CPT1B	RWPE1	24.33
Repeat 1	2	CPT1B	RWPE1	24.31
Repeat 1	3	CPT1B	RWPE1	24.42
Repeat 1	1	CPT1B	PC3	23.44
Repeat 1	2	CPT1B	PC3	23.39
Repeat 1	3	CPT1B	PC3	23.54
Repeat 1	1	CPT1B	LNCAP	23.16
Repeat 1	2	CPT1B	LNCAP	23.1
Repeat 1	3	CPT1B	LNCAP	23.18
Repeat 1	1	CROT	RWPE1	21.77
Repeat 1	2	CROT	RWPE1	21.73
Repeat 1	3	CROT	RWPE1	21.71
Repeat 1	1	CROT	PC3	20.92
Repeat 1	2	CROT	PC3	20.88
Repeat 1	3	CROT	PC3	21.03
Repeat 1	1	CROT	LNCAP	19.11
Repeat 1	2	CROT	LNCAP	19.15
Repeat 1	3	CROT	LNCAP	19.19
Repeat 1	1	NUDT19	RWPE1	21.79
Repeat 1	2	NUDT19	RWPE1	21.85
Repeat 1	3	NUDT19	RWPE1	21.71
Repeat 1	1	NUDT19	PC3	21.81
Repeat 1	2	NUDT19	PC3	21.95
Repeat 1	3	NUDT19	PC3	21.95
Repeat 1	1	NUDT19	LNCAP	19.63
Repeat 1	2	NUDT19	LNCAP	19.86
Repeat 1	3	NUDT19	LNCAP	19.74
Repeat 2	1	GAPDH	RWPE1	14.08
Repeat 2	2	GAPDH	RWPE1	13.91
Repeat 2	3	GAPDH	RWPE1	13.88
Repeat 2	1	GAPDH	PC3	13.87
Repeat 2	2	GAPDH	PC3	14.02
Repeat 2	3	GAPDH	PC3	14.03
Repeat 2	1	GAPDH	LNCAP	14.31
Repeat 2	2	GAPDH	LNCAP	14.18
Repeat 2	3	GAPDH	LNCAP	14.2
Repeat 2	1	ALDH1A1	RWPE1	23.45
Repeat 2	2	ALDH1A1	RWPE1	23.3
Repeat 2	3	ALDH1A1	RWPE1	23.42
Repeat 2	1	ALDH1A1	PC3	29.42
Repeat 2	2	ALDH1A1	PC3	29.31
Repeat 2	3	ALDH1A1	PC3	29.49
Repeat 2	1	ALDH1A1	LNCAP	29.84
Repeat 2	2	ALDH1A1	LNCAP	29.93
Repeat 2	3	ALDH1A1	LNCAP	29.88
Repeat 2	1	CA2	RWPE1	20.13
Repeat 2	2	CA2	RWPE1	19.9
Repeat 2	3	CA2	RWPE1	19.92
Repeat 2	1	CA2	PC3	27.83
Repeat 2	2	CA2	PC3	27.87
Repeat 2	3	CA2	PC3	27.67
Repeat 2	1	CA2	LNCAP	33.08
Repeat 2	2	CA2	LNCAP	32.57
Repeat 2	3	CA2	LNCAP	33.14
Repeat 2	1	CPT1B	RWPE1	23.35
Repeat 2	2	CPT1B	RWPE1	23.15
Repeat 2	3	CPT1B	RWPE1	23.3
Repeat 2	1	CPT1B	PC3	22.53
Repeat 2	2	CPT1B	PC3	22.48
Repeat 2	3	CPT1B	PC3	22.4
Repeat 2	1	CPT1B	LNCAP	22.04
Repeat 2	2	CPT1B	LNCAP	22.07
Repeat 2	3	CPT1B	LNCAP	22.05
Repeat 2	1	CROT	RWPE1	21.55
Repeat 2	2	CROT	RWPE1	21.67
Repeat 2	3	CROT	RWPE1	21.47
Repeat 2	1	CROT	PC3	20.69
Repeat 2	2	CROT	PC3	20.68
Repeat 2	3	CROT	PC3	20.66
Repeat 2	1	CROT	LNCAP	18.86
Repeat 2	2	CROT	LNCAP	18.78
Repeat 2	3	CROT	LNCAP	18.93
Repeat 2	1	NUDT19	RWPE1	21.27
Repeat 2	2	NUDT19	RWPE1	21.23
Repeat 2	3	NUDT19	RWPE1	21.25
Repeat 2	1	NUDT19	PC3	21.2
Repeat 2	2	NUDT19	PC3	21.19
Repeat 2	3	NUDT19	PC3	21.18
Repeat 2	1	NUDT19	LNCAP	19.07
Repeat 2	2	NUDT19	LNCAP	19.14
Repeat 2	3	NUDT19	LNCAP	19.14
Repeat 3	1	GAPDH	RWPE1	14.45
Repeat 3	2	GAPDH	RWPE1	14.62
Repeat 3	3	GAPDH	RWPE1	14.58
Repeat 3	1	GAPDH	PC3	14.21
Repeat 3	2	GAPDH	PC3	14.17
Repeat 3	3	GAPDH	PC3	14.4
Repeat 3	1	GAPDH	LNCAP	14.54
Repeat 3	2	GAPDH	LNCAP	14.56
Repeat 3	3	GAPDH	LNCAP	14.56
Repeat 3	1	ALDH1A1	RWPE1	23.71
Repeat 3	2	ALDH1A1	RWPE1	24
Repeat 3	3	ALDH1A1	RWPE1	23.94
Repeat 3	1	ALDH1A1	PC3	29.38
Repeat 3	2	ALDH1A1	PC3	29.23
Repeat 3	3	ALDH1A1	PC3	29.2
Repeat 3	1	ALDH1A1	LNCAP	29.44
Repeat 3	2	ALDH1A1	LNCAP	29.51
Repeat 3	3	ALDH1A1	LNCAP	29.32
Repeat 3	1	CA2	RWPE1	19.93
Repeat 3	2	CA2	RWPE1	20.03
Repeat 3	3	CA2	RWPE1	20.11
Repeat 3	1	CA2	PC3	28.23
Repeat 3	2	CA2	PC3	28.38
Repeat 3	3	CA2	PC3	28.46
Repeat 3	1	CA2	LNCAP	32.71
Repeat 3	2	CA2	LNCAP	33.05
Repeat 3	3	CA2	LNCAP	34.06
Repeat 3	1	CPT1B	RWPE1	23.75
Repeat 3	2	CPT1B	RWPE1	23.72
Repeat 3	3	CPT1B	RWPE1	23.76
Repeat 3	1	CPT1B	PC3	22.71
Repeat 3	2	CPT1B	PC3	22.65
Repeat 3	3	CPT1B	PC3	22.67
Repeat 3	1	CPT1B	LNCAP	22.25
Repeat 3	2	CPT1B	LNCAP	22.23
Repeat 3	3	CPT1B	LNCAP	22.35
Repeat 3	1	CROT	RWPE1	21.88
Repeat 3	2	CROT	RWPE1	21.88
Repeat 3	3	CROT	RWPE1	22.02
Repeat 3	1	CROT	PC3	20.98
Repeat 3	2	CROT	PC3	20.74
Repeat 3	3	CROT	PC3	20.83
Repeat 3	1	CROT	LNCAP	19.09
Repeat 3	2	CROT	LNCAP	19.12
Repeat 3	3	CROT	LNCAP	19.05
Repeat 3	1	NUDT19	RWPE1	21.57
Repeat 3	2	NUDT19	RWPE1	21.6
Repeat 3	3	NUDT19	RWPE1	21.54
Repeat 3	1	NUDT19	PC3	21.11
Repeat 3	2	NUDT19	PC3	21.17
Repeat 3	3	NUDT19	PC3	21.2
Repeat 3	1	NUDT19	LNCAP	19.29
Repeat 3	2	NUDT19	LNCAP	19.31
Repeat 3	3	NUDT19	LNCAP	19.39
